# Supplementary material for: HK1 from hepatic stellate cell–derived extracellular vesicles promotes progression of hepatocellular carcinoma
Source: PubMed Central journal article supplement (PMC9584821; doi:10.1038/s42255-022-00642-5), 2022-10-03

# Uncropped western blot images

## Figure 6

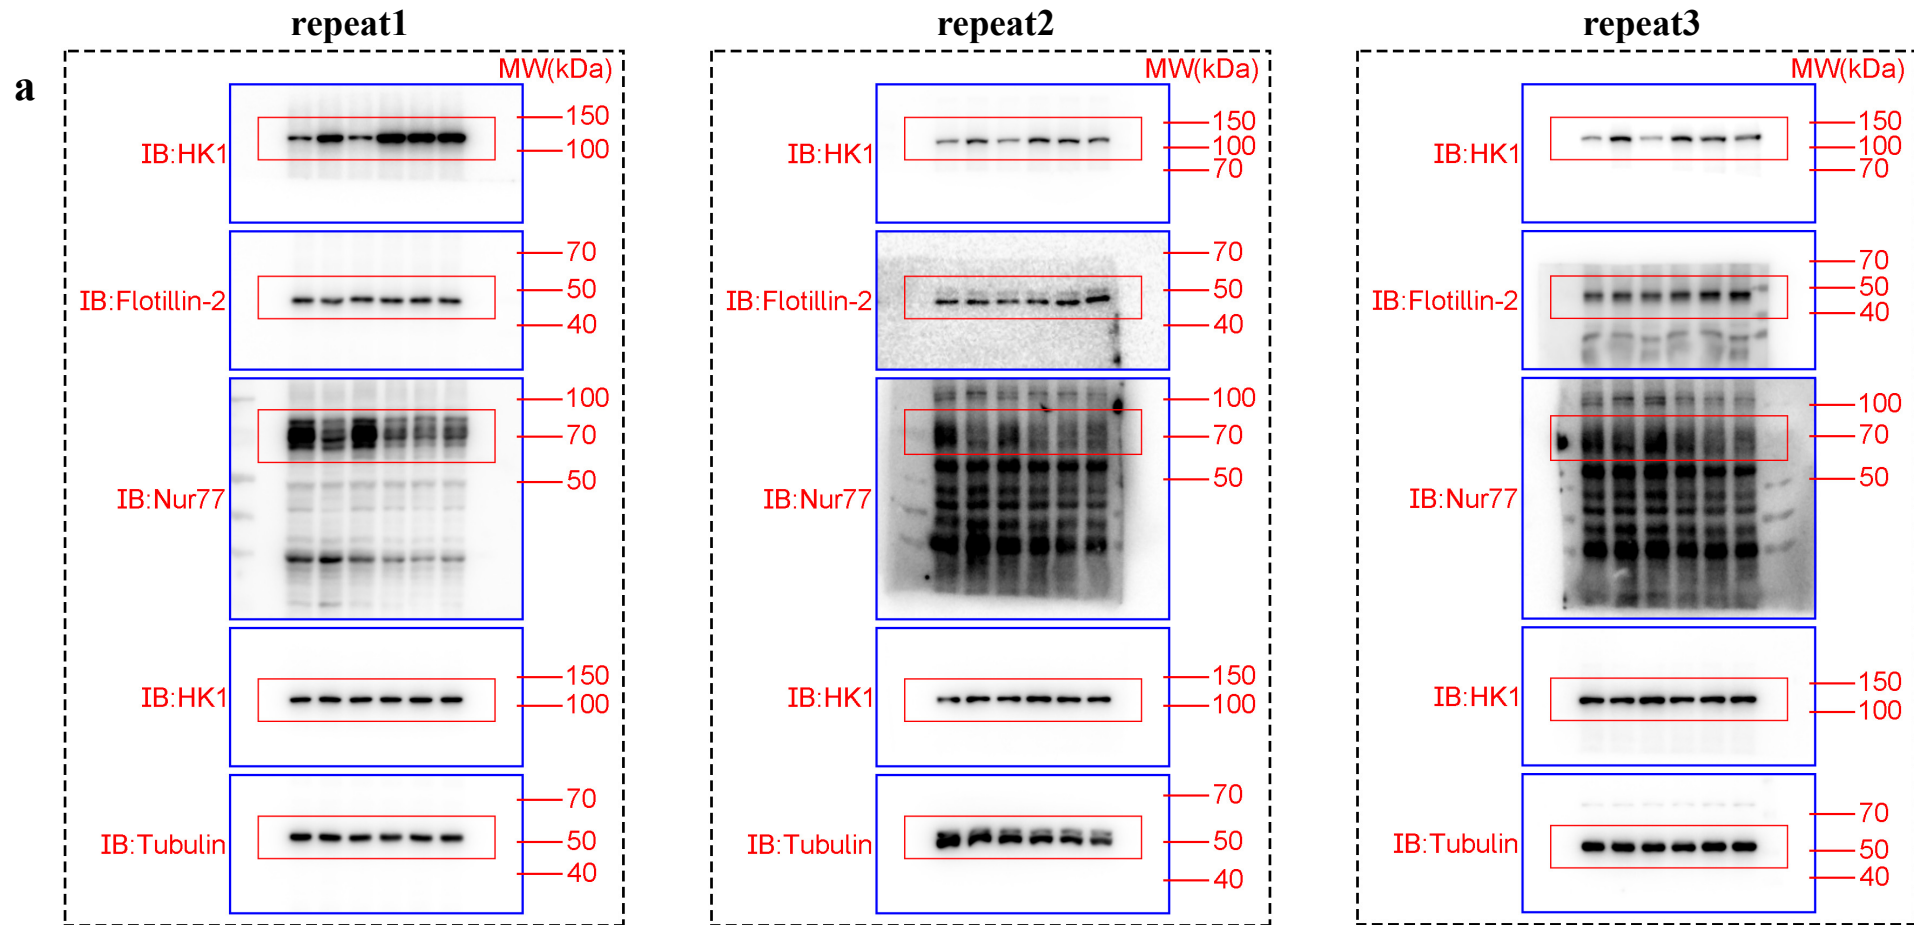

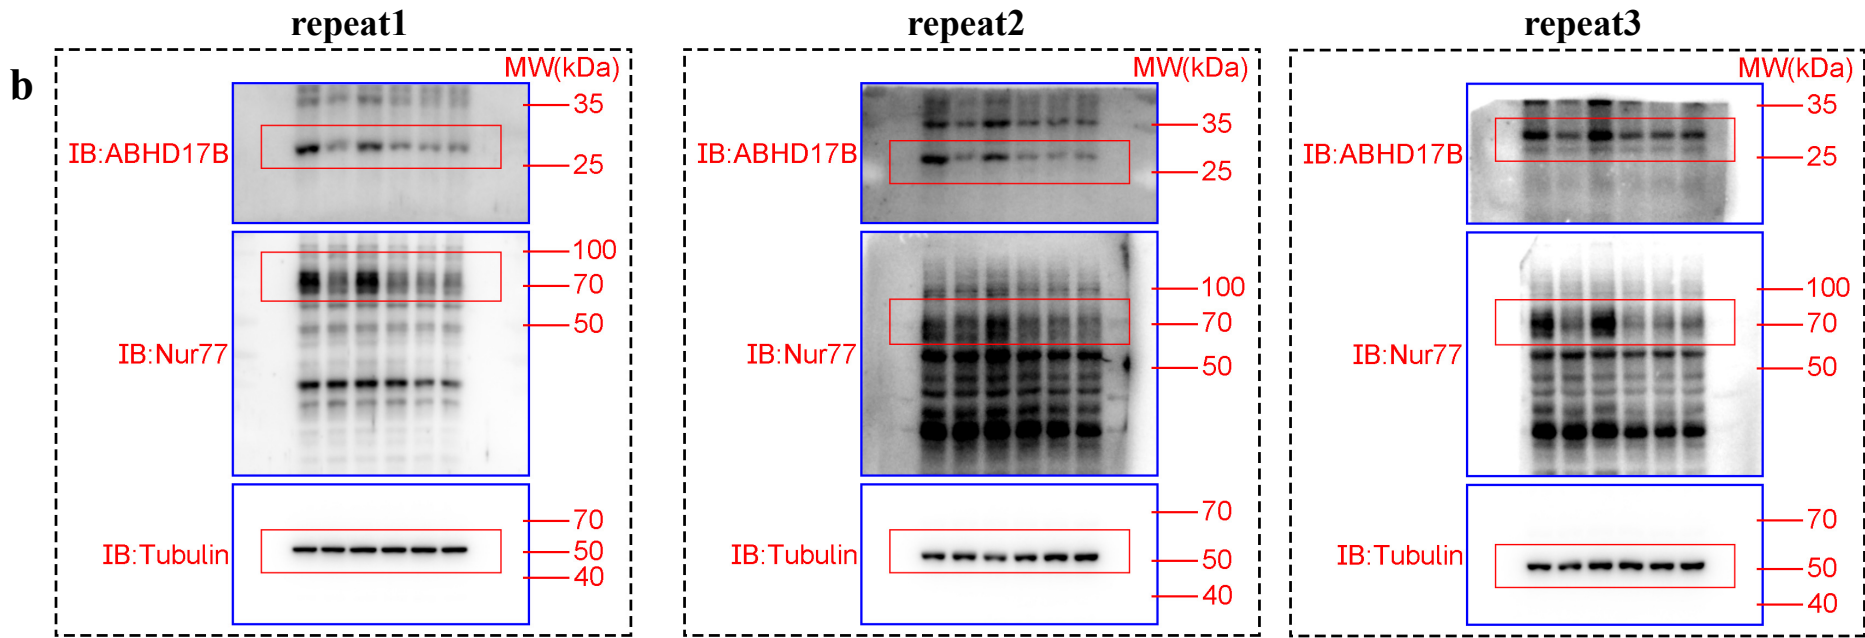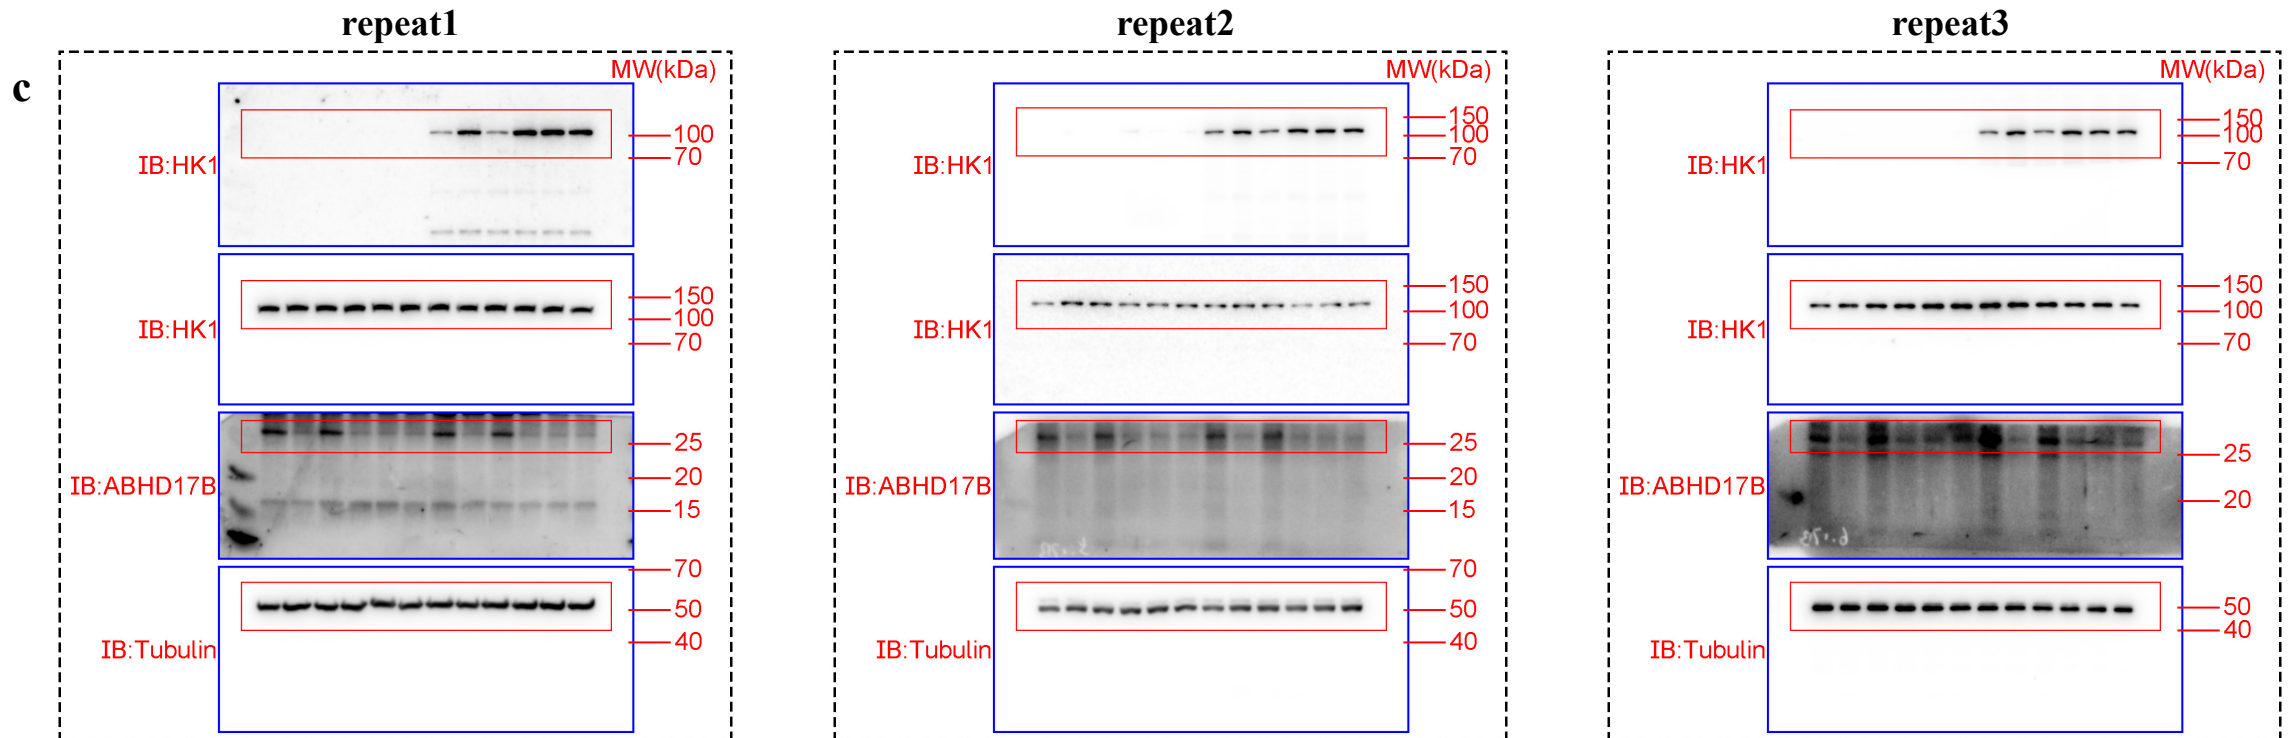

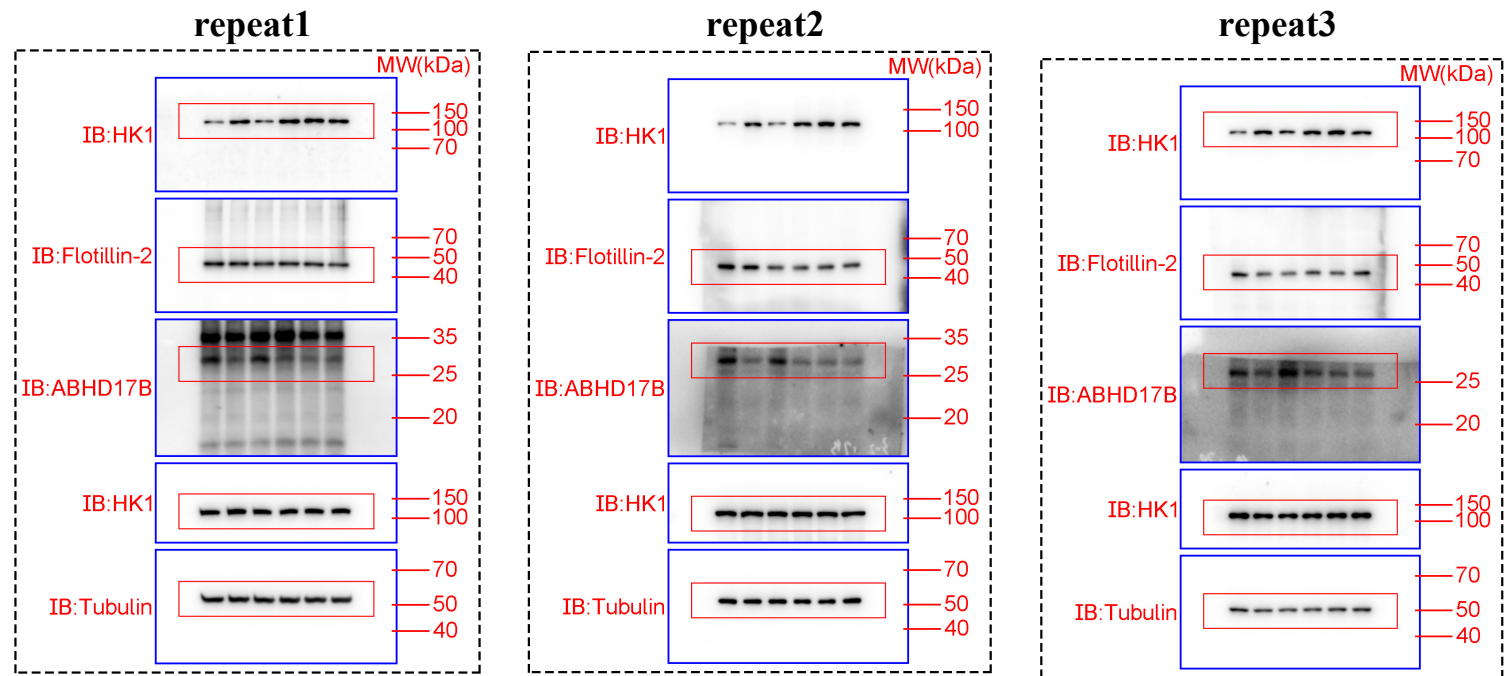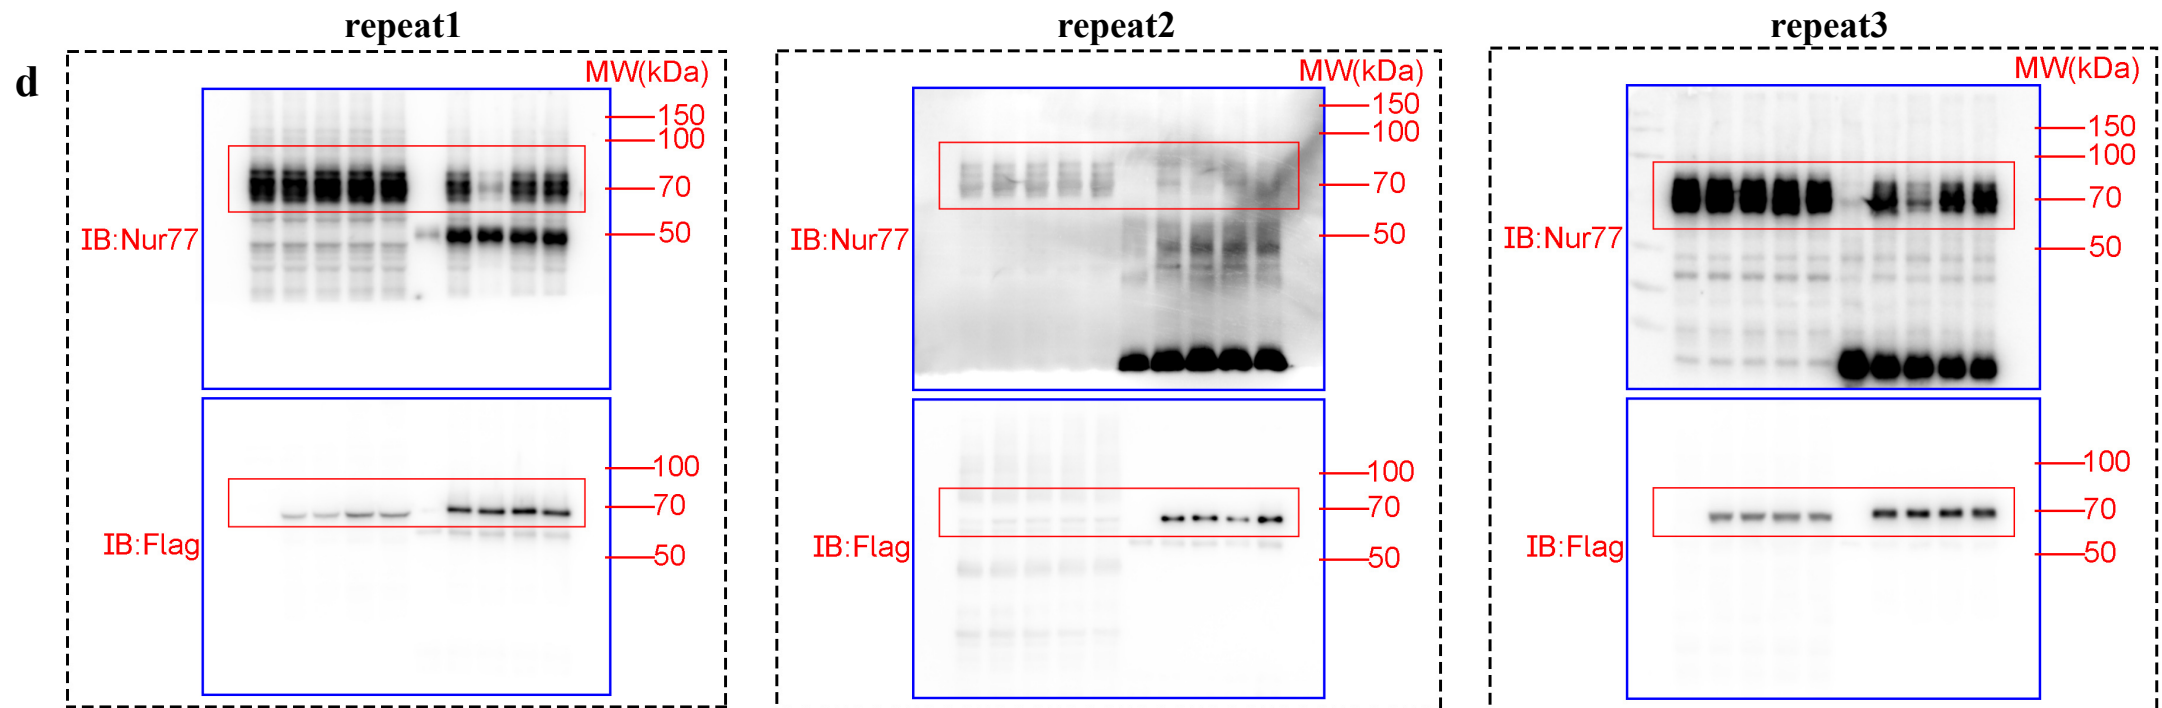

e

repeat1

repeat2

repeat3

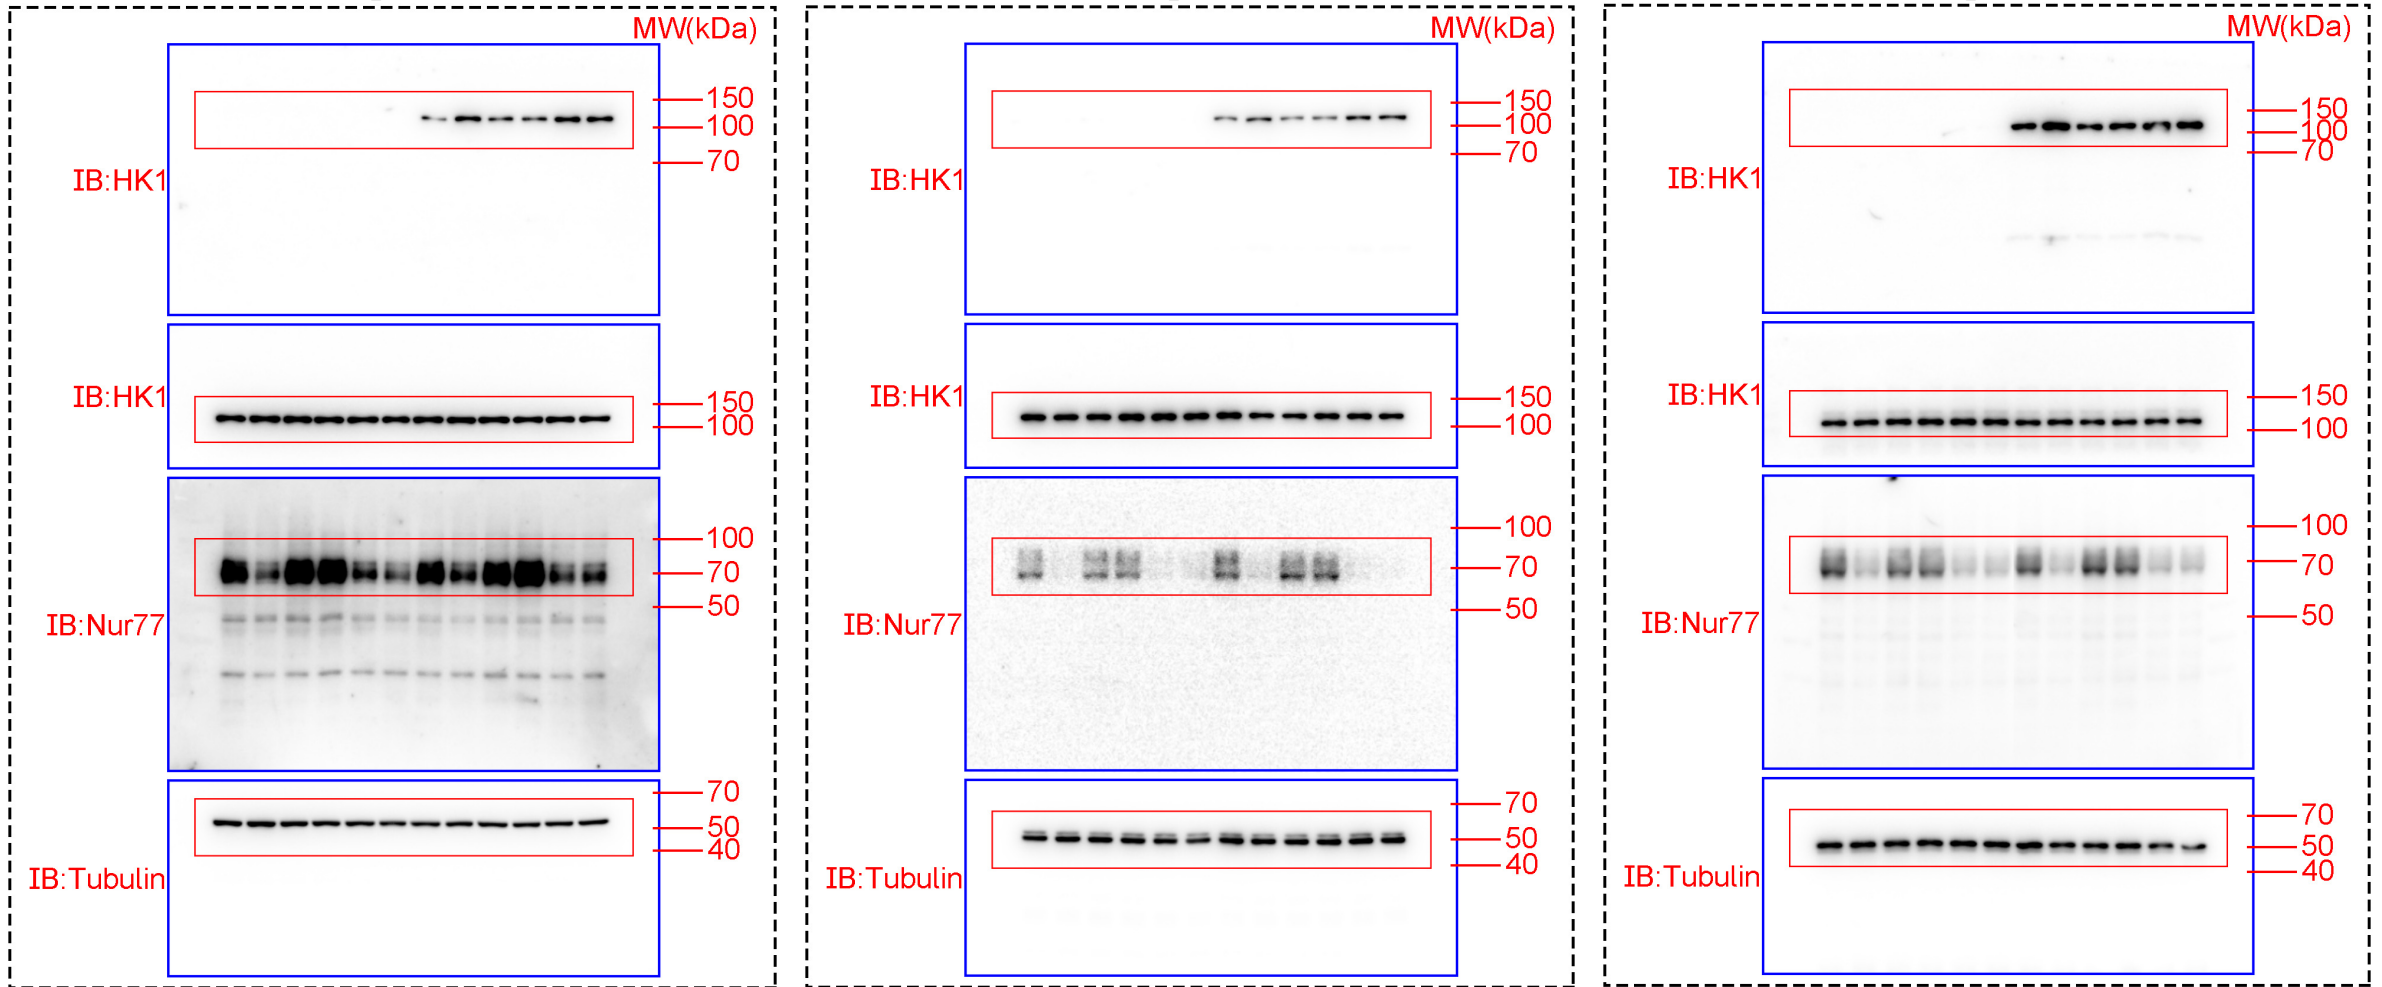

repeat1

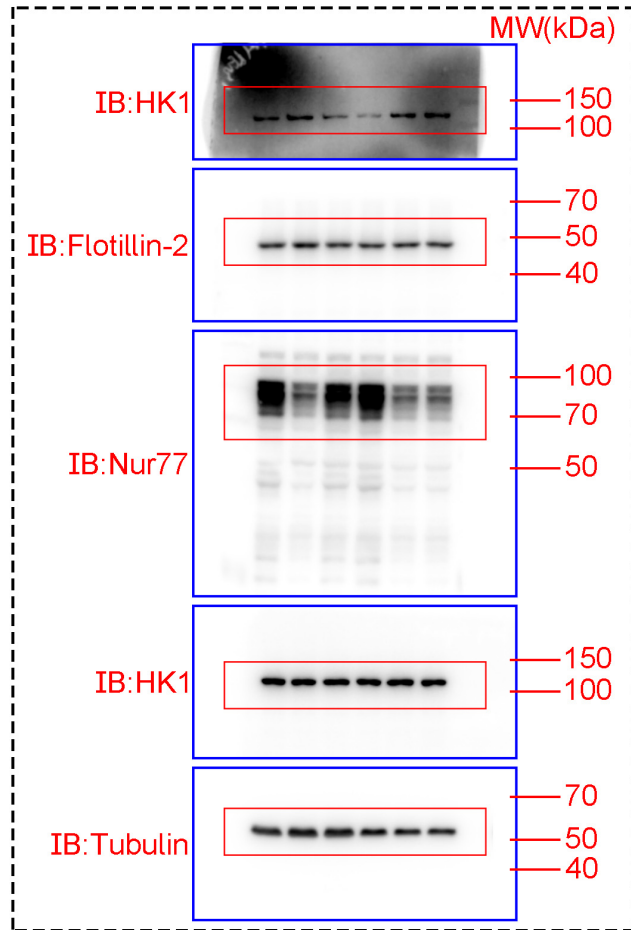

repeat2

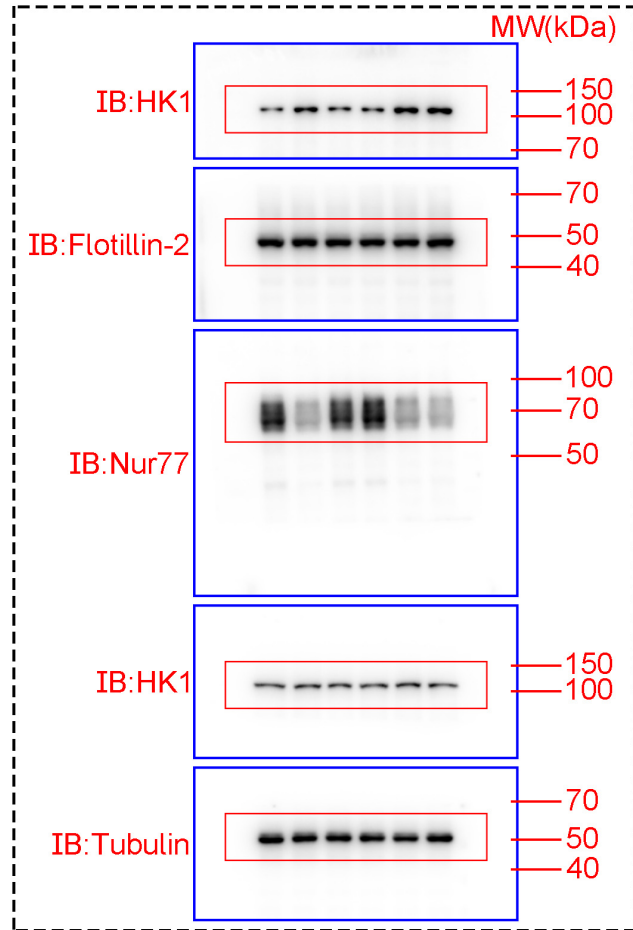

repeat3

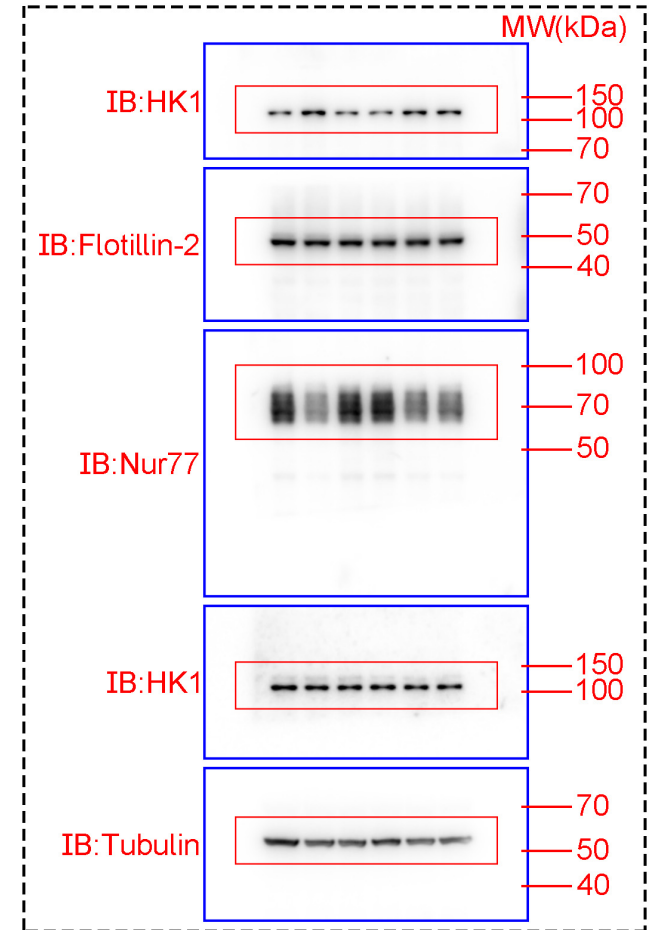

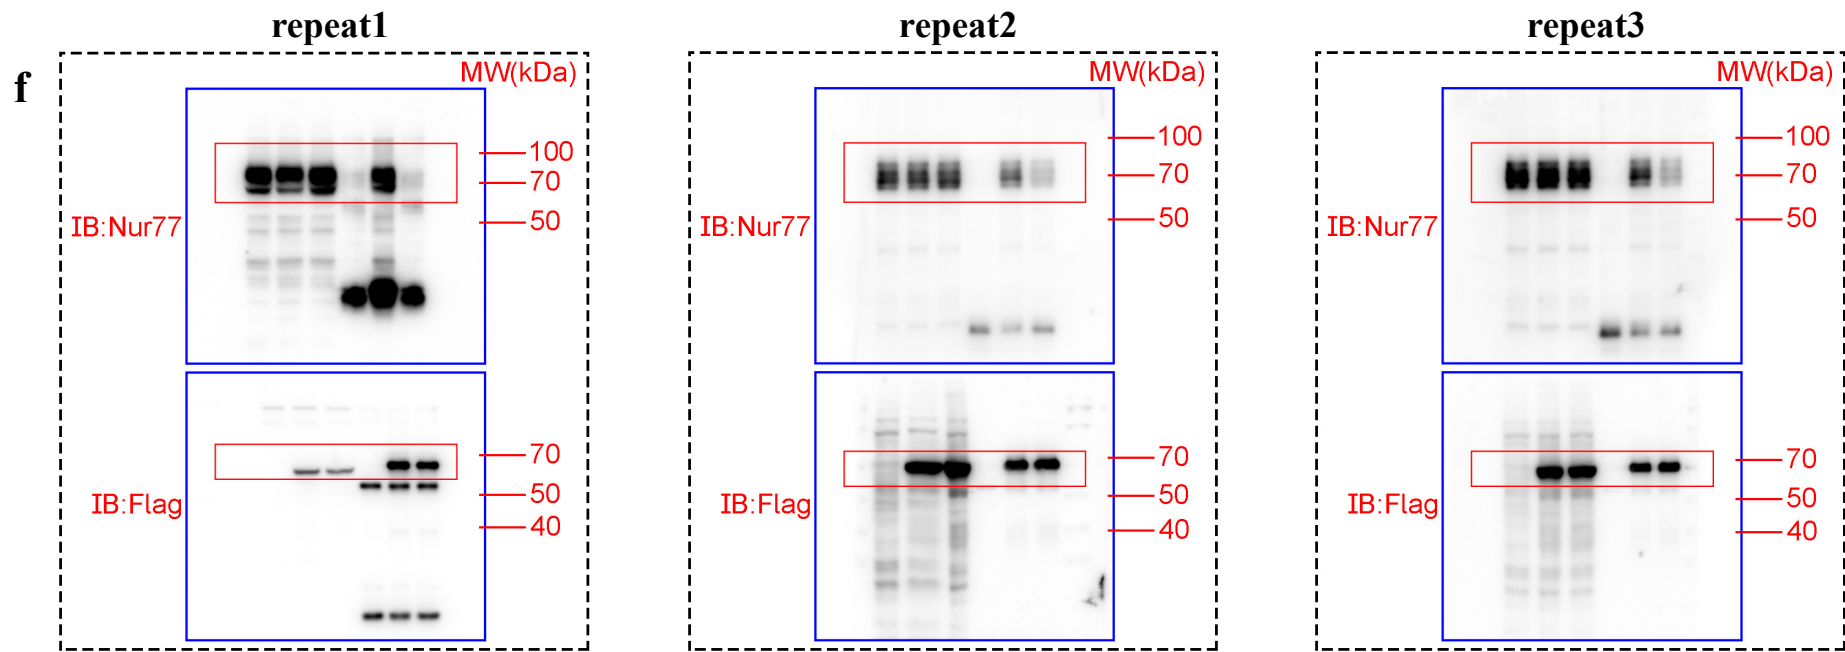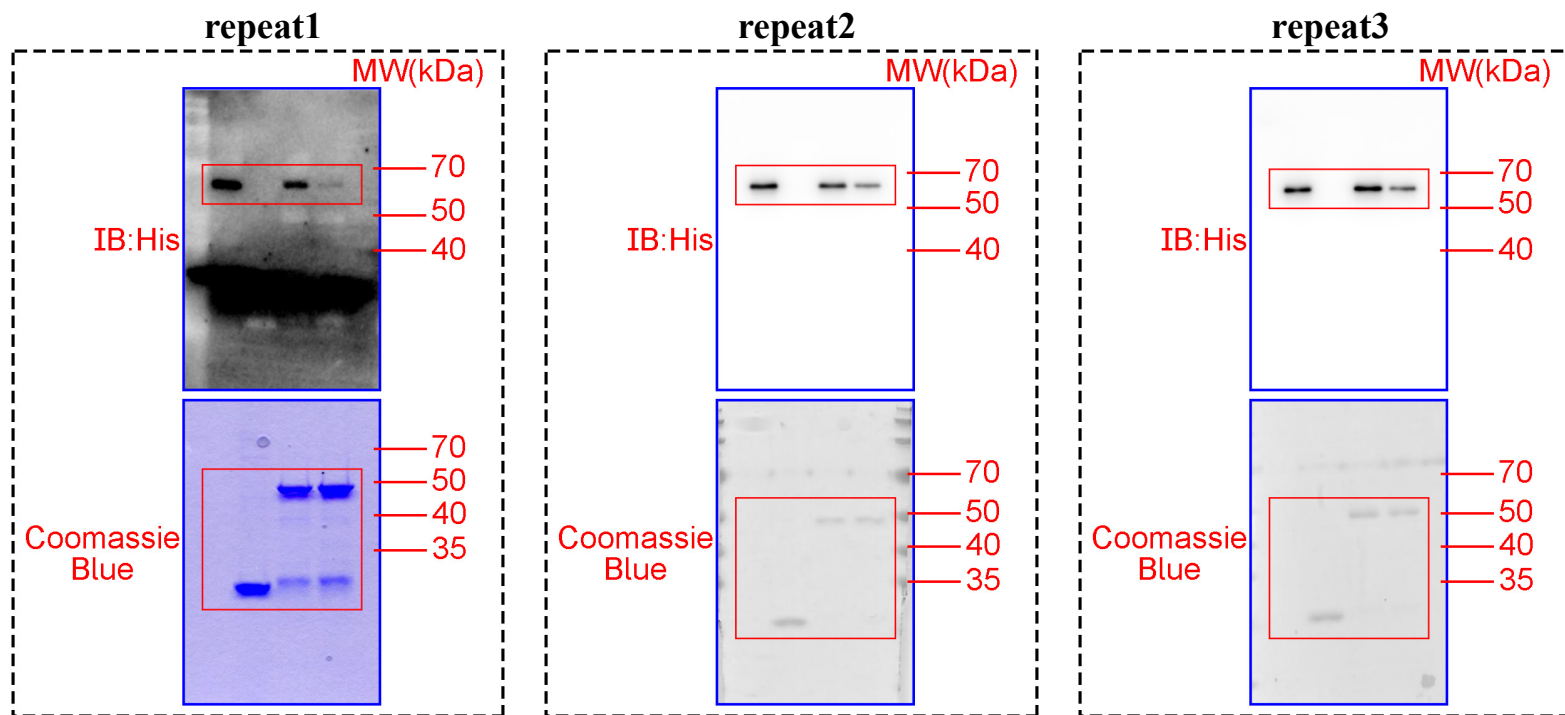

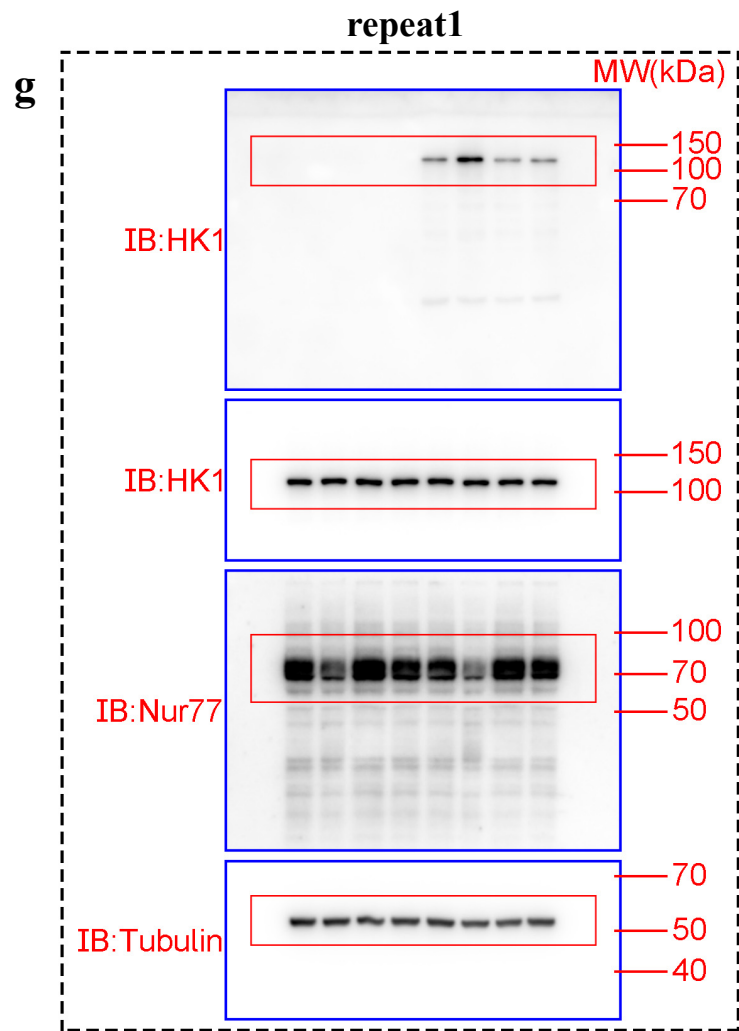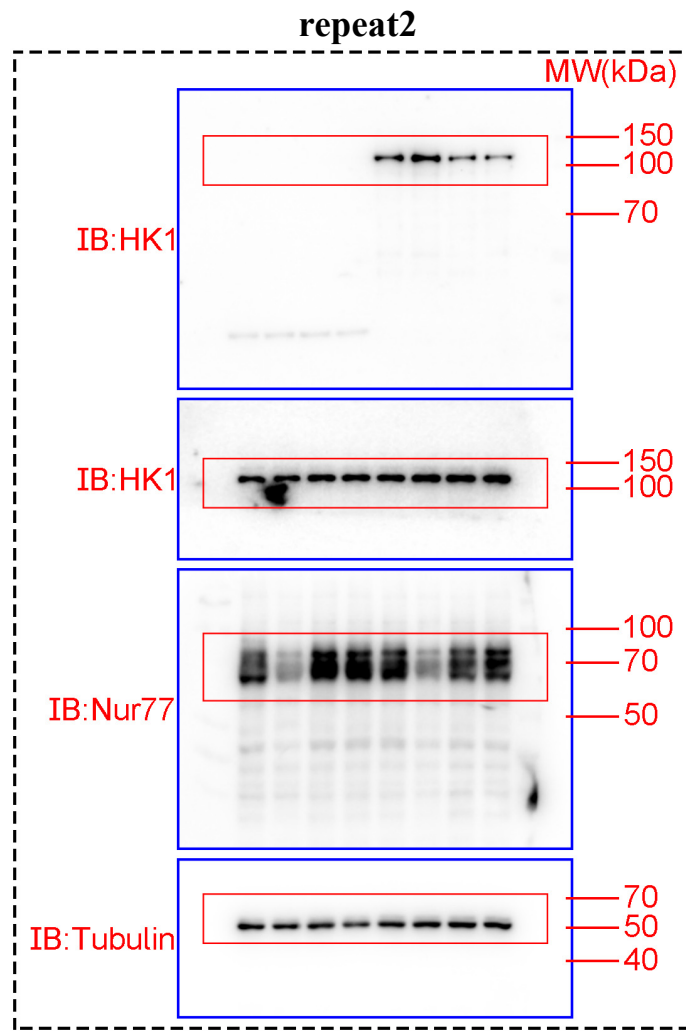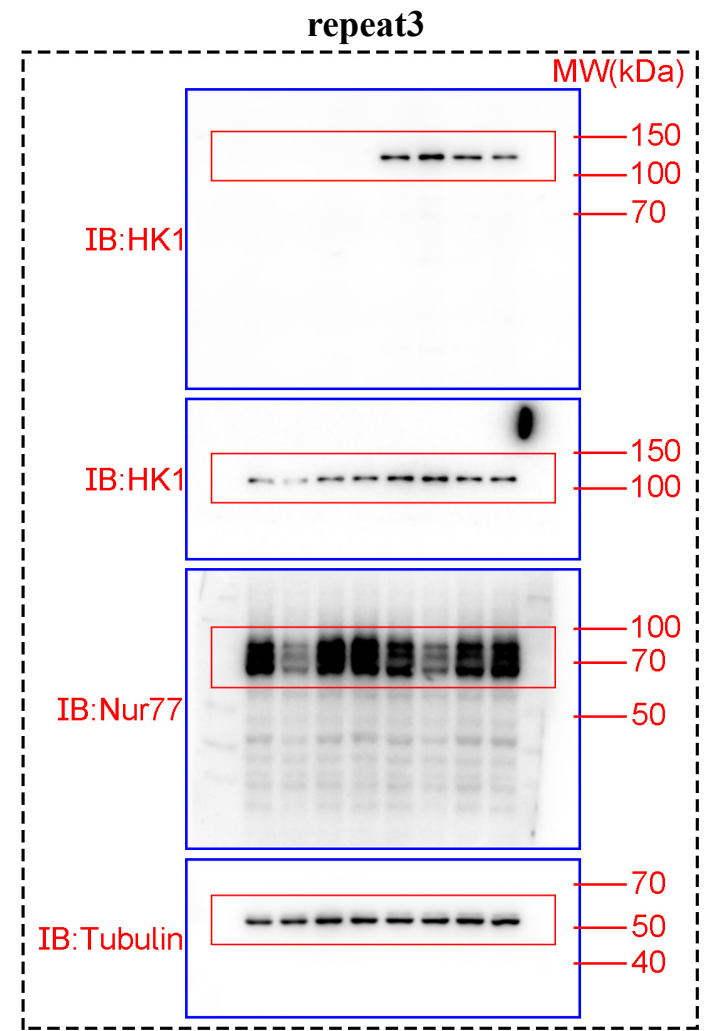

repeat1

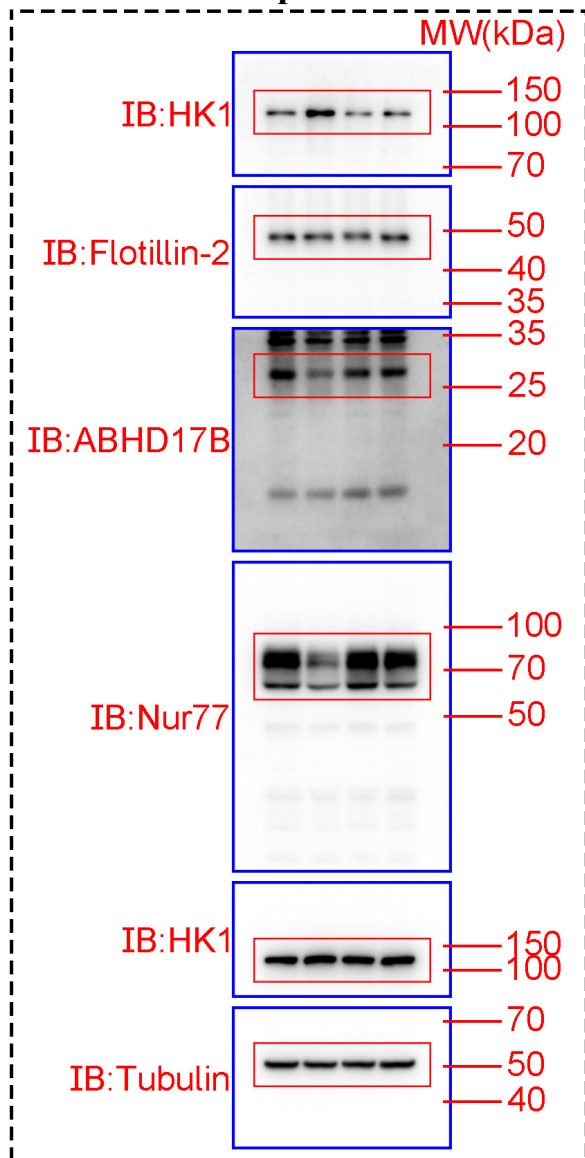

repeat2

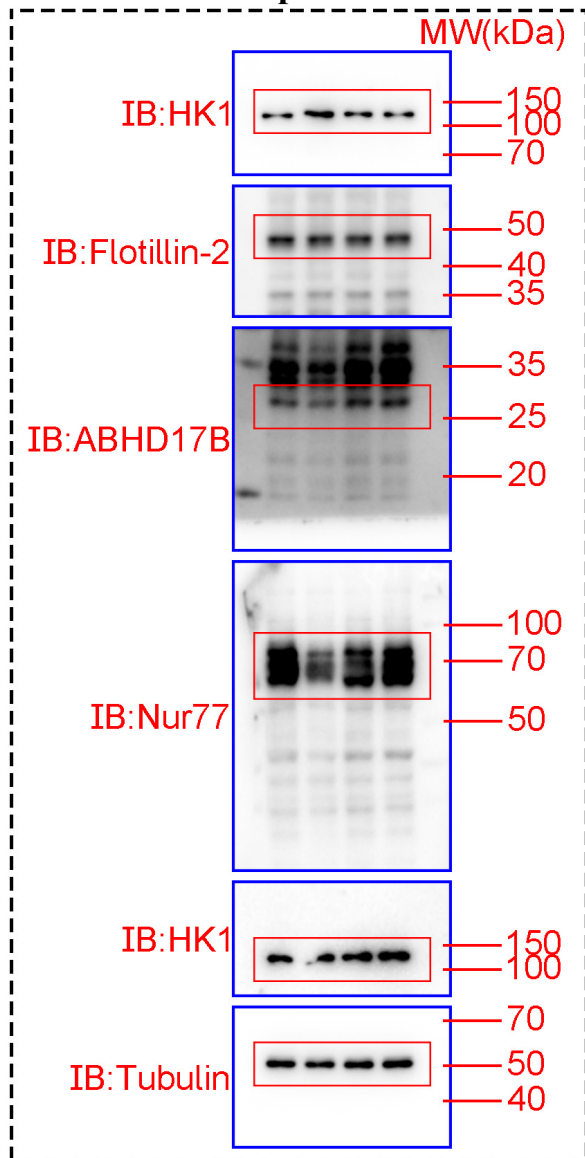

repeat3

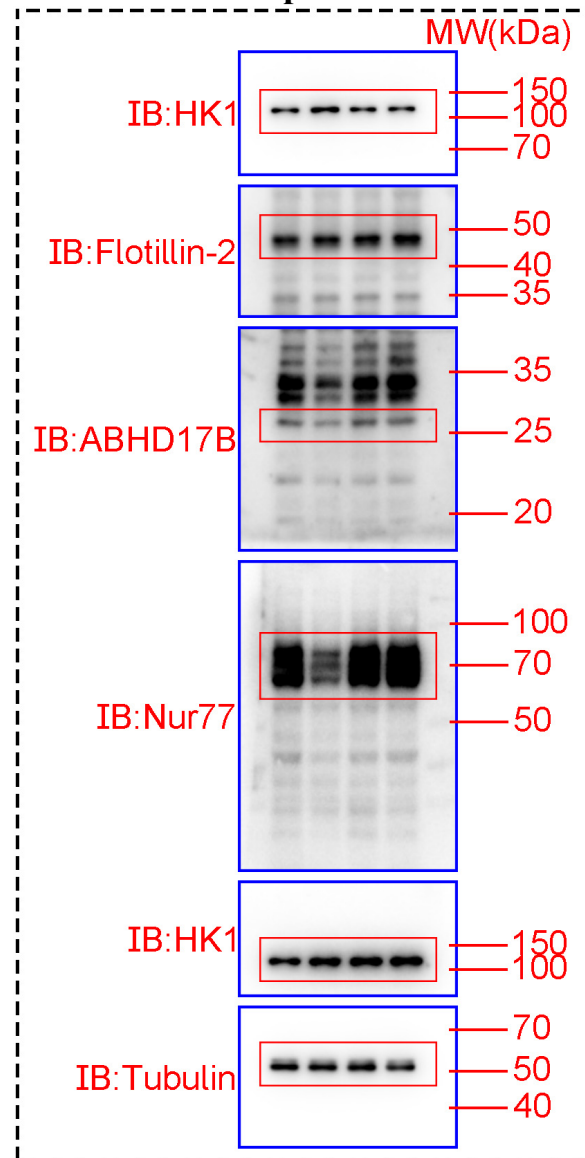

Supplement: 42255_2022_642_MOESM15_ESM.pdf [file 42255_2022_642_MOESM15_ESM.pdf]
