# Supplementary material for: HK1 from hepatic stellate cell–derived extracellular vesicles promotes progression of hepatocellular carcinoma
Source: PubMed Central journal article supplement (PMC9584821; doi:10.1038/s42255-022-00642-5), 2022-10-03

# Uncropped western blot images

## Extended Data Figure 1

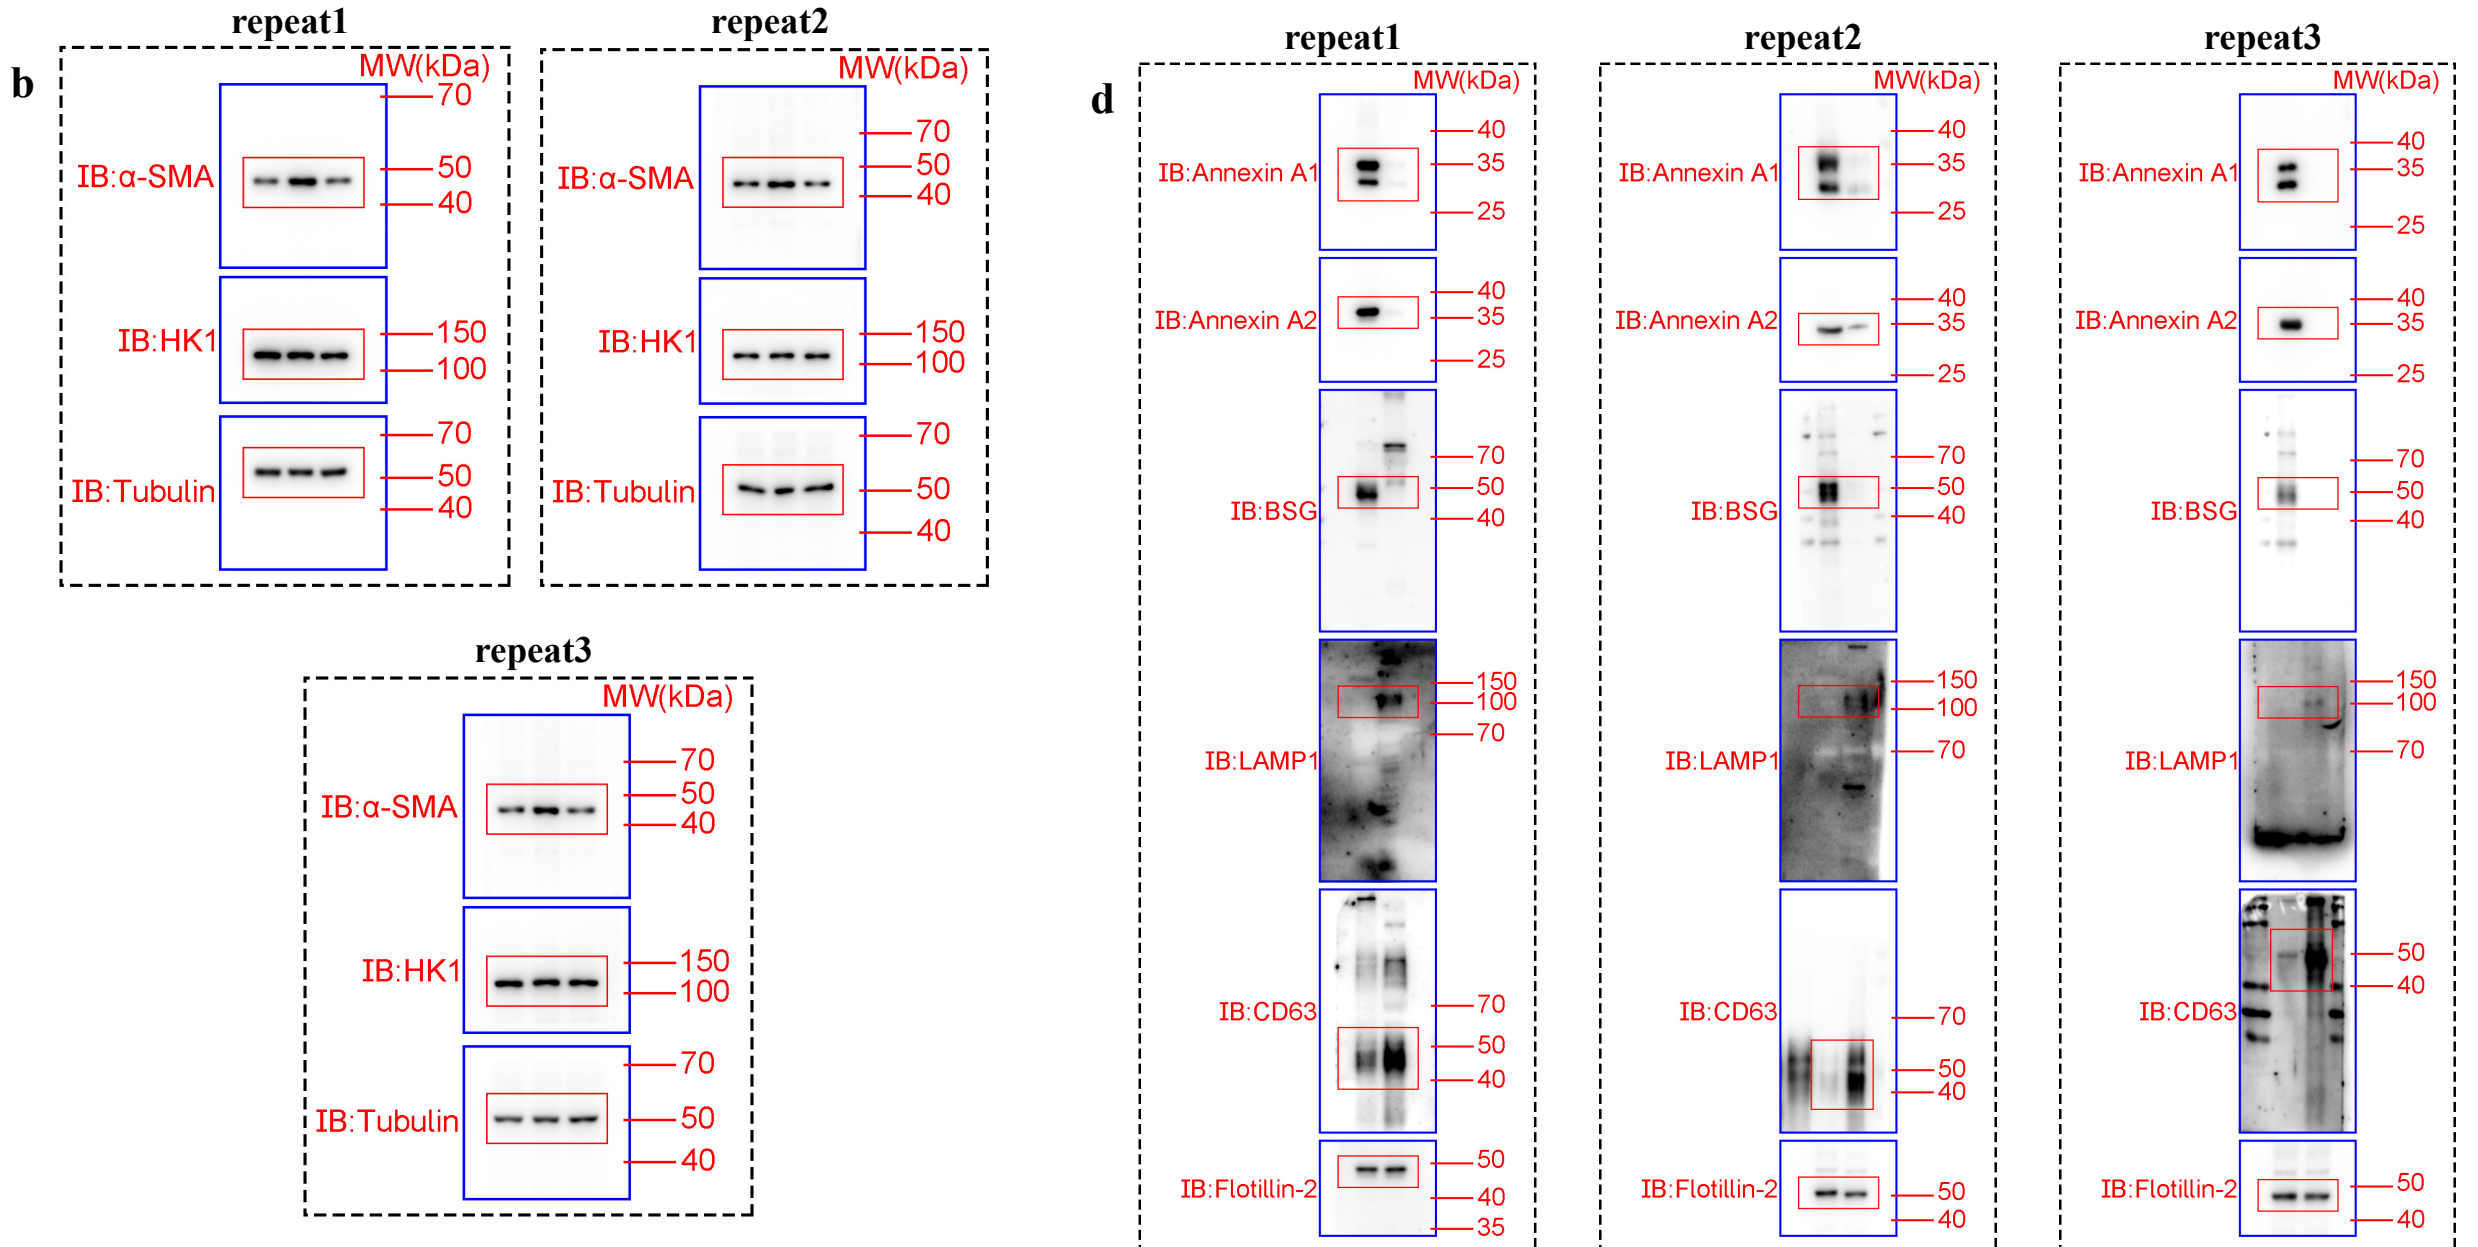

e

repeat1

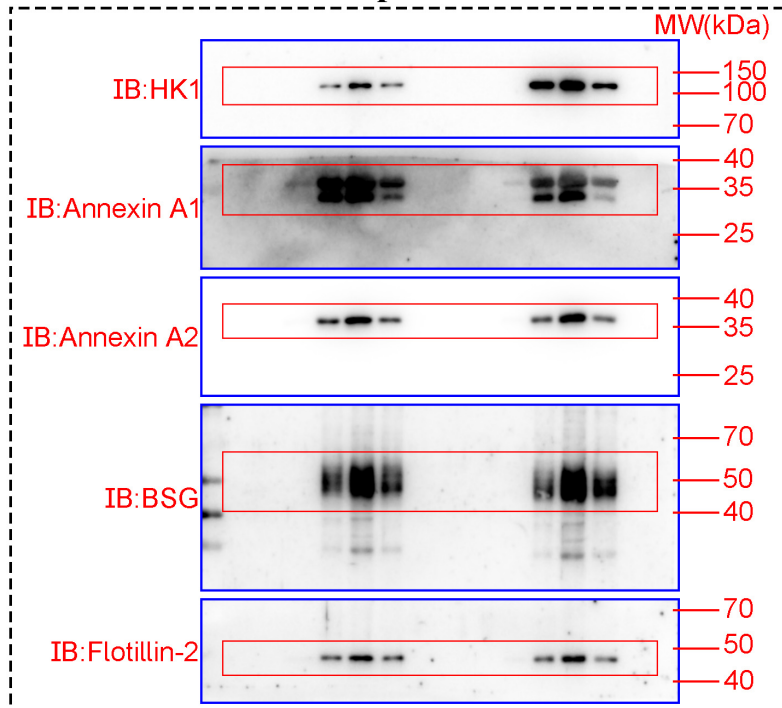

repeat2

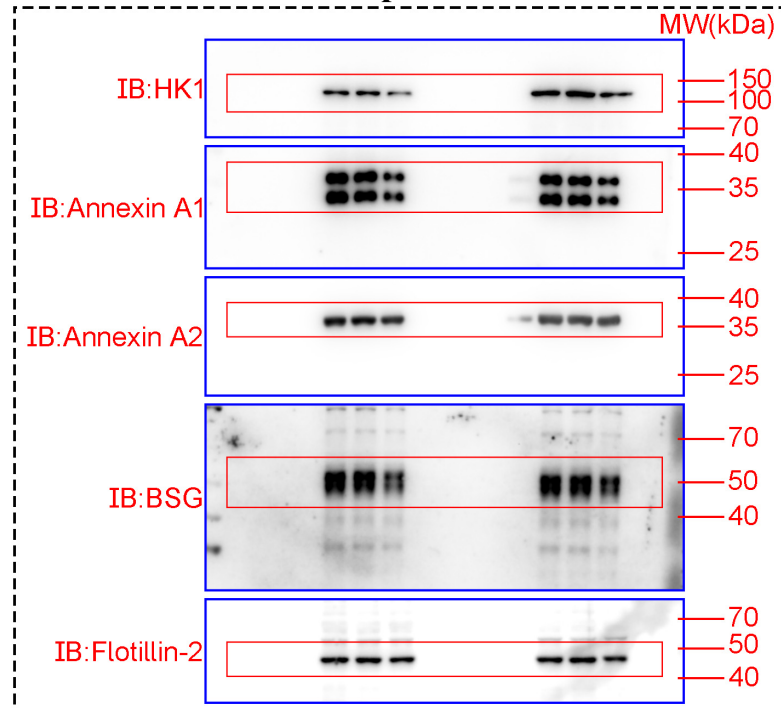

repeat3

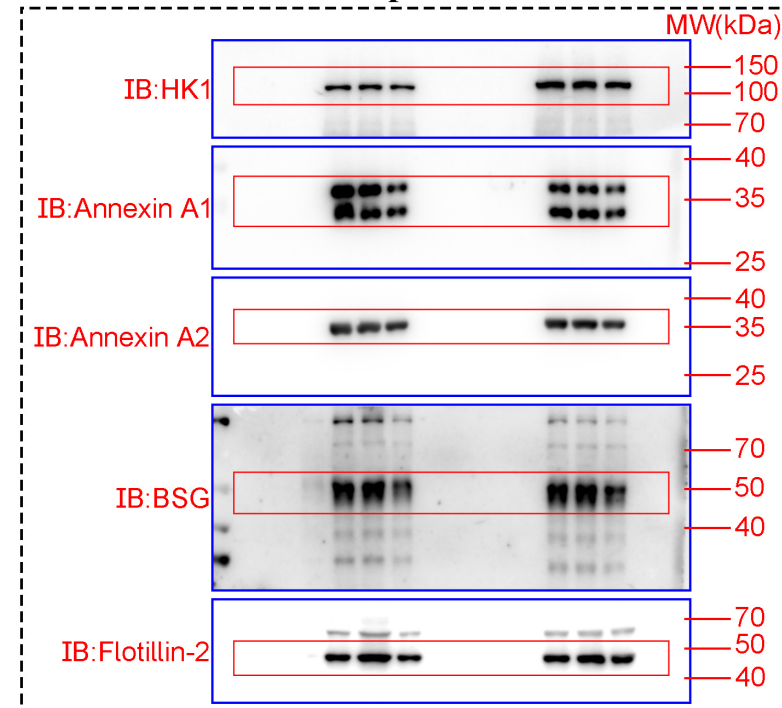

**f**

**repeat1**

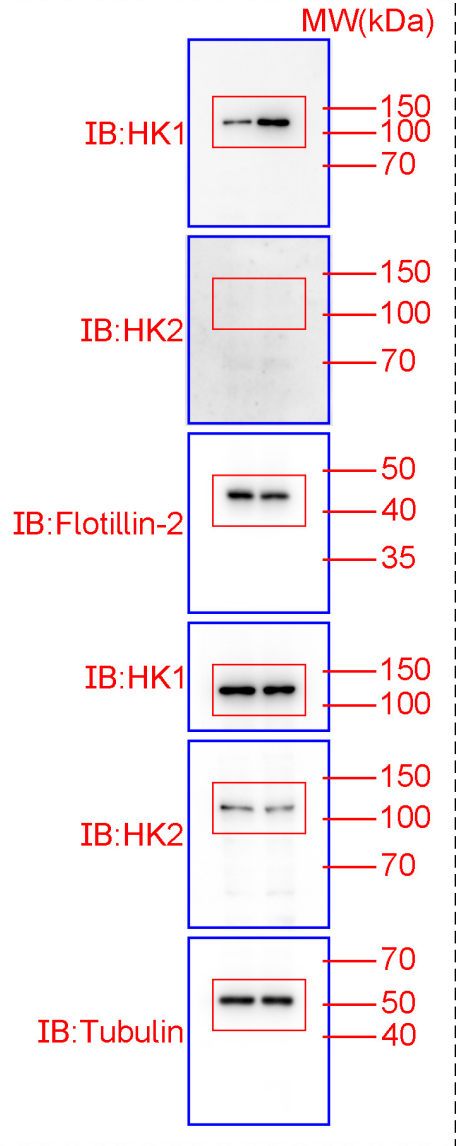

**repeat2**

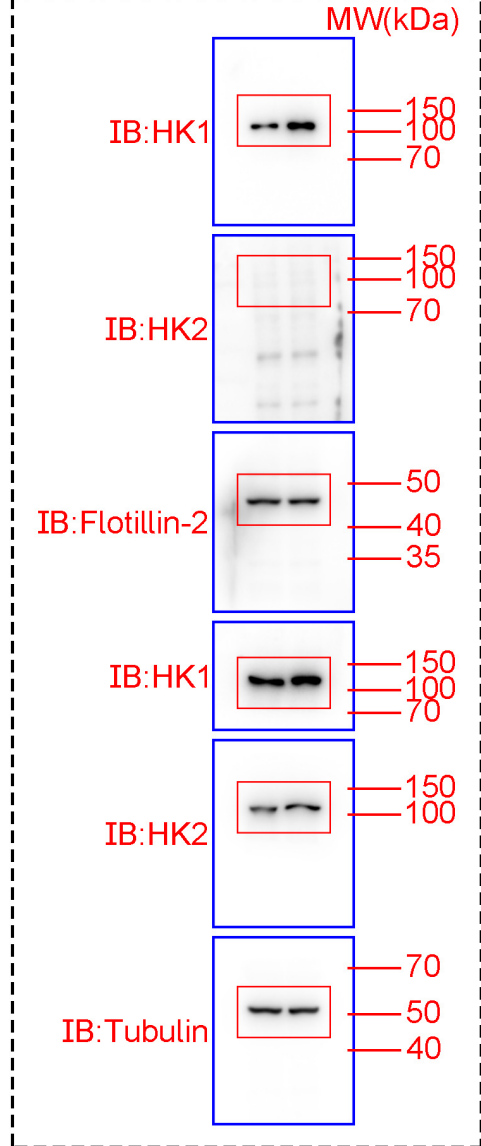

**repeat3**

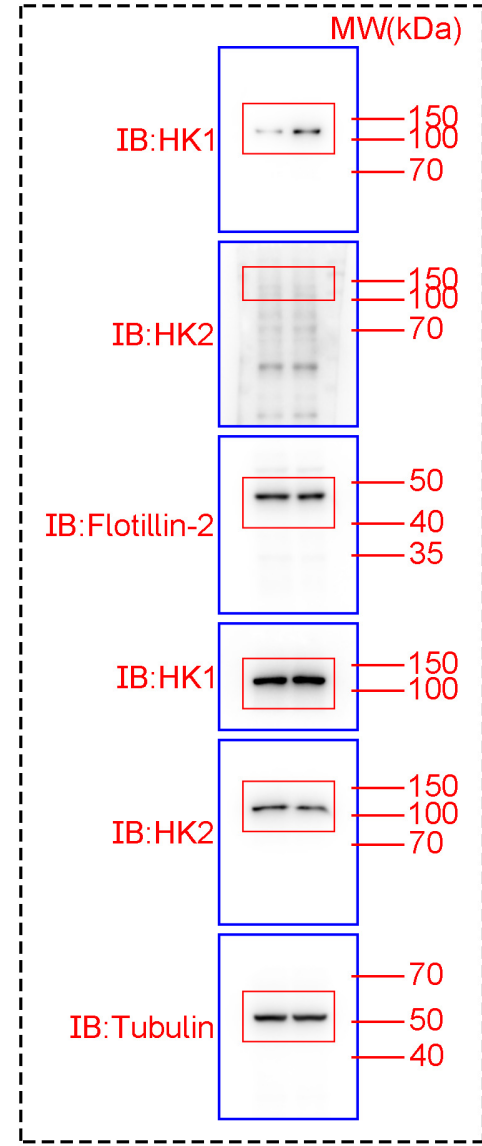

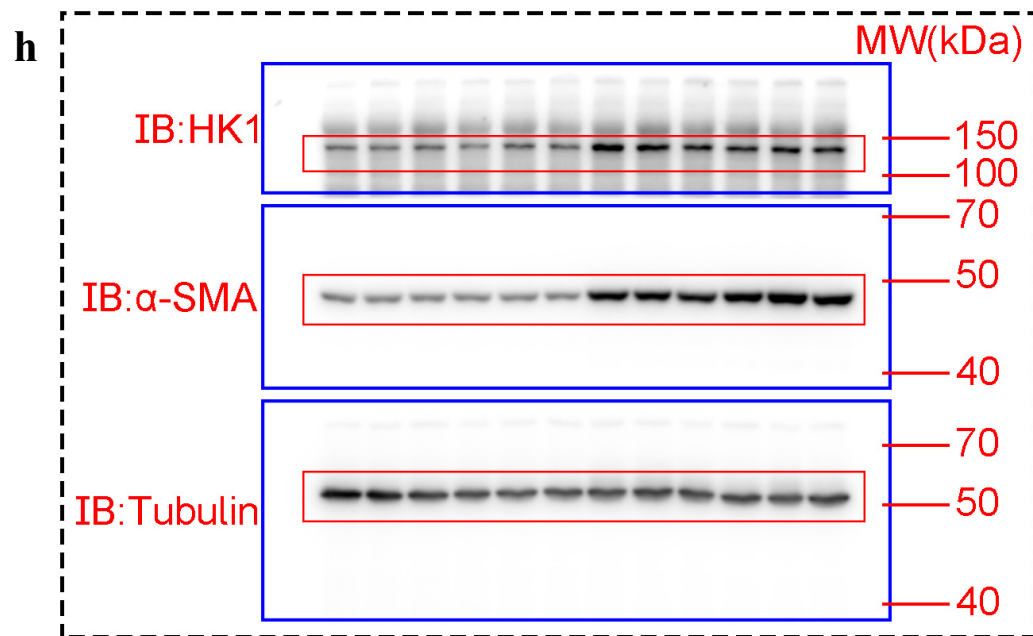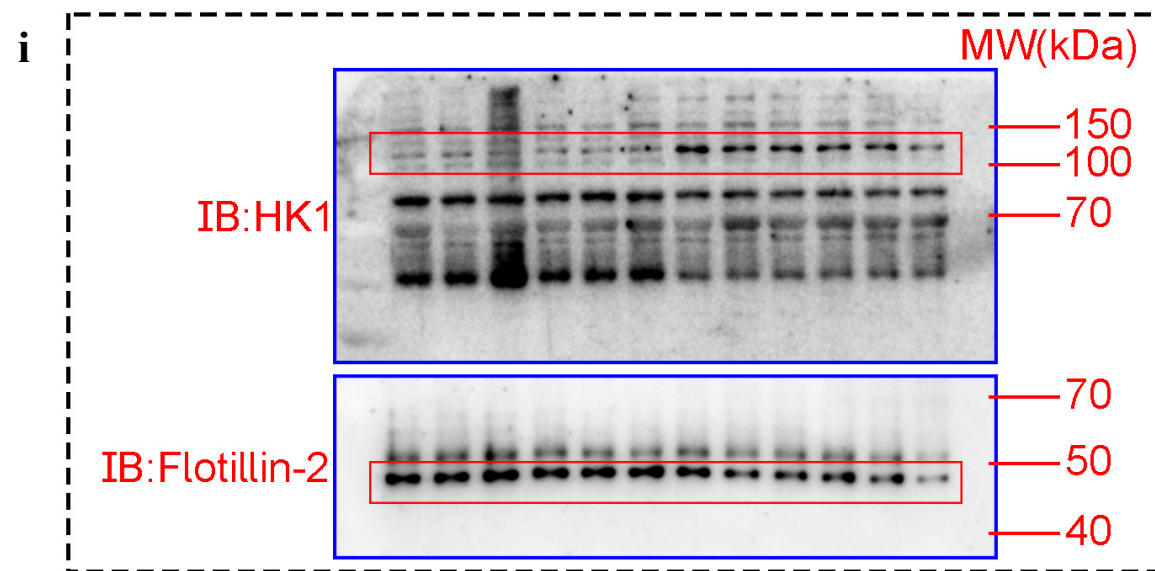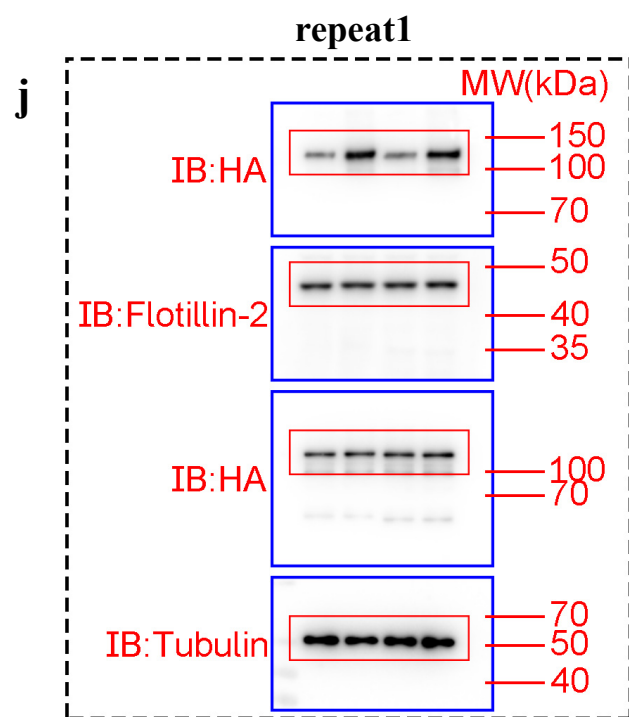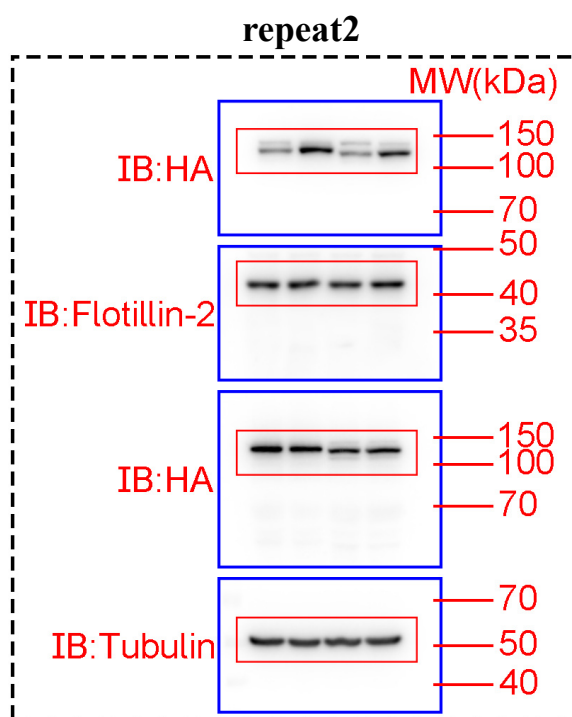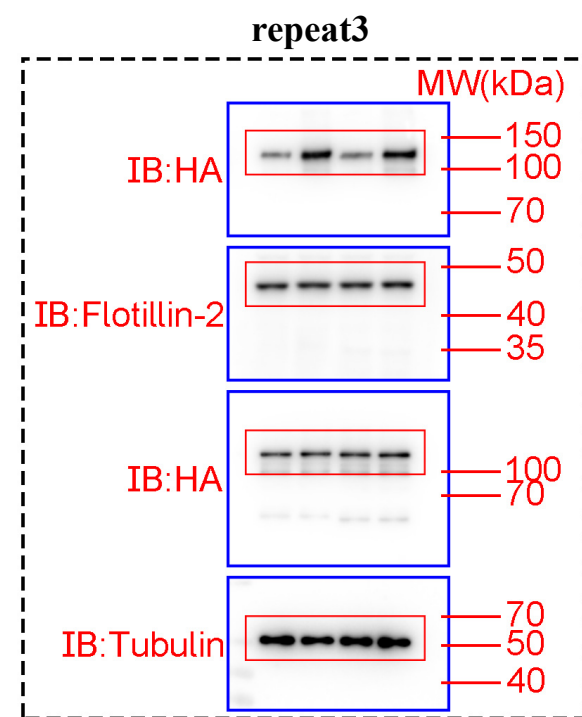

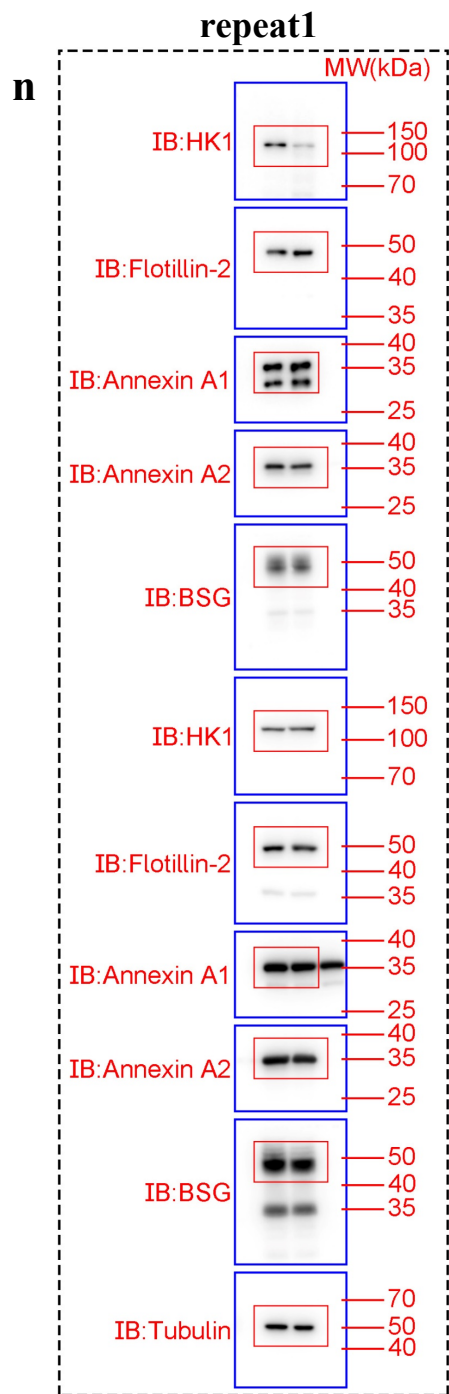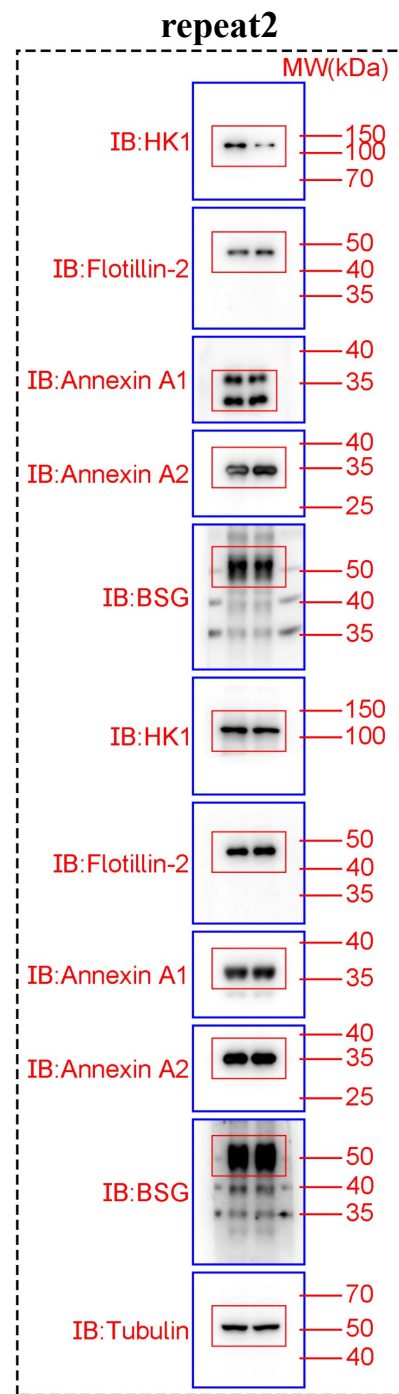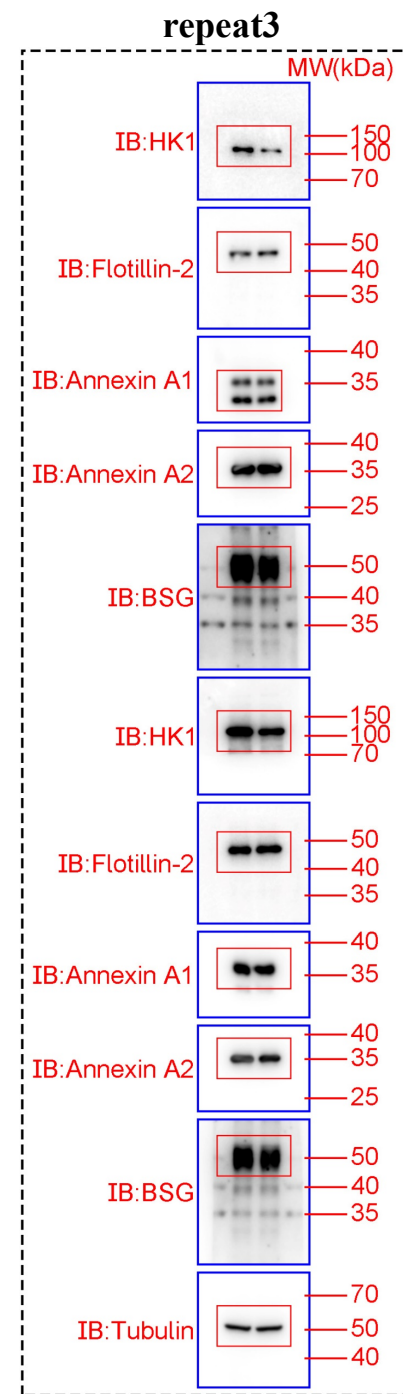

Supplement: 42255_2022_642_MOESM17_ESM.pdf [file 42255_2022_642_MOESM17_ESM.pdf]
