# Supplementary material for: HK1 from hepatic stellate cell–derived extracellular vesicles promotes progression of hepatocellular carcinoma
Source: PubMed Central journal article supplement (PMC9584821; doi:10.1038/s42255-022-00642-5), 2022-10-03

Uncropped western blot images  
Extended Data Figure 2

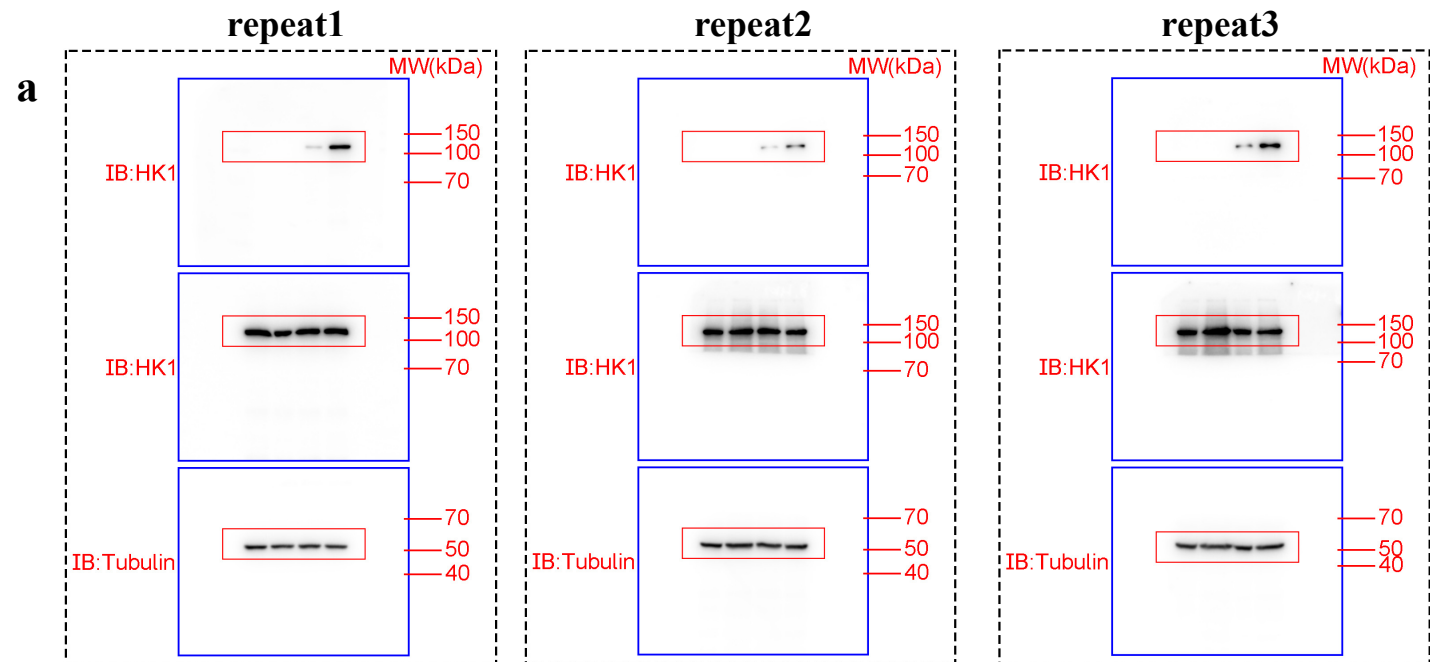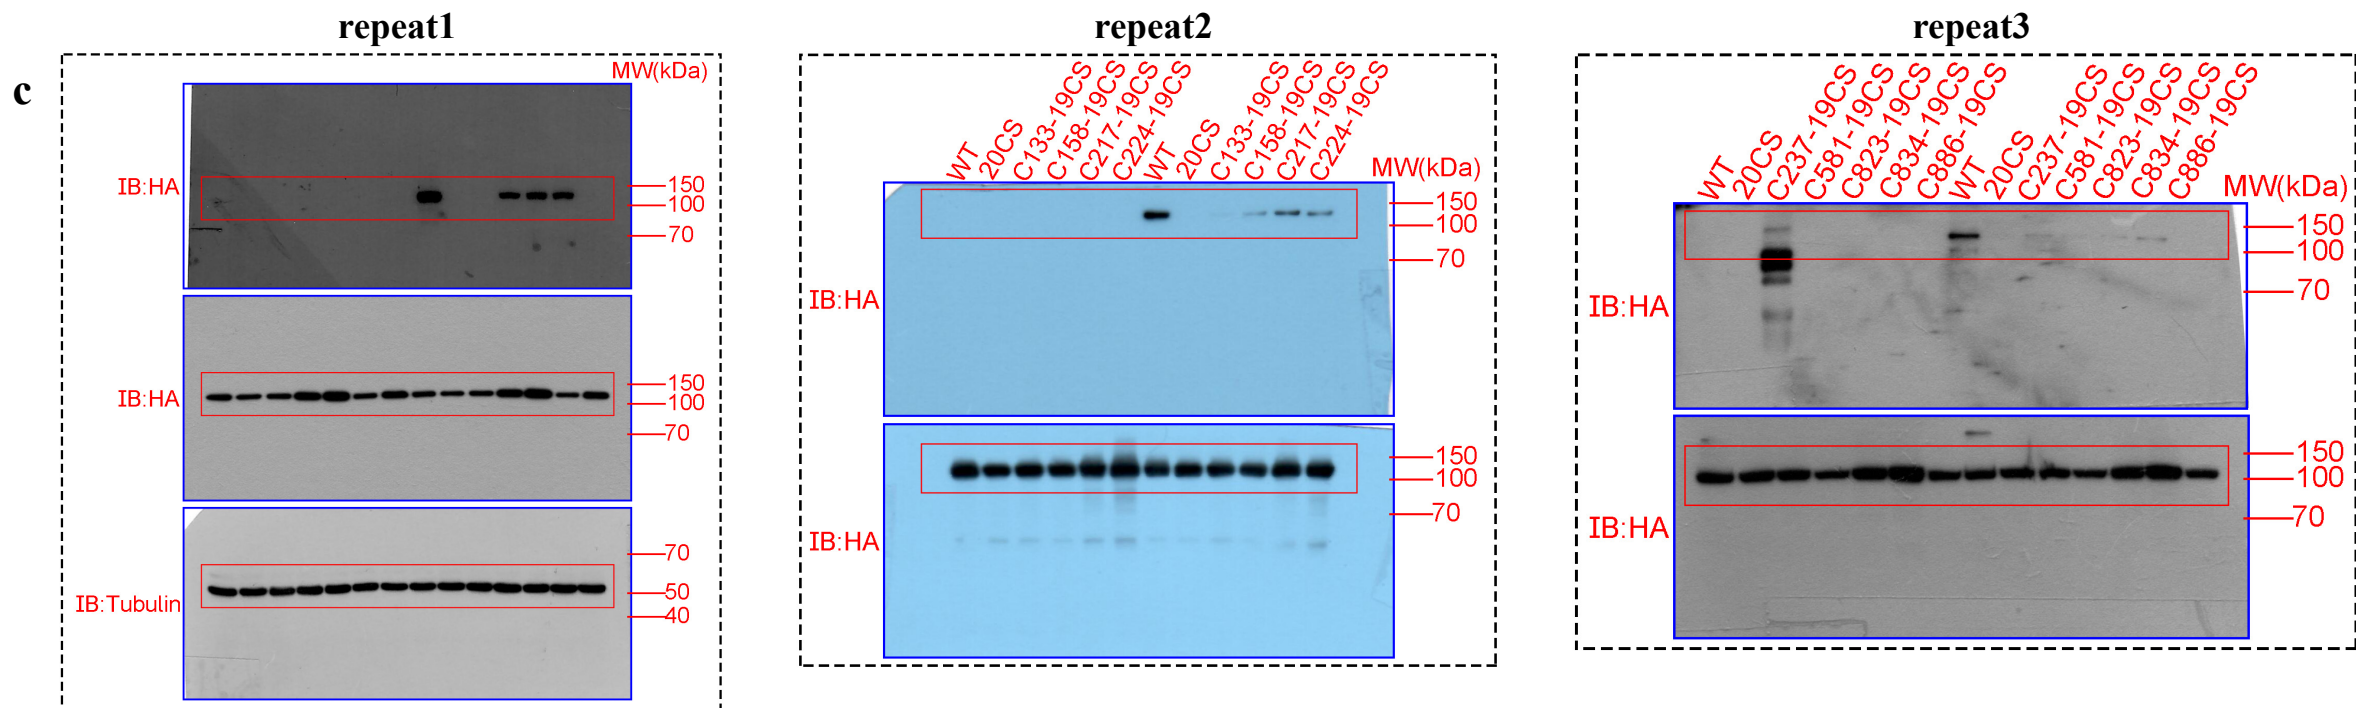

repeat1

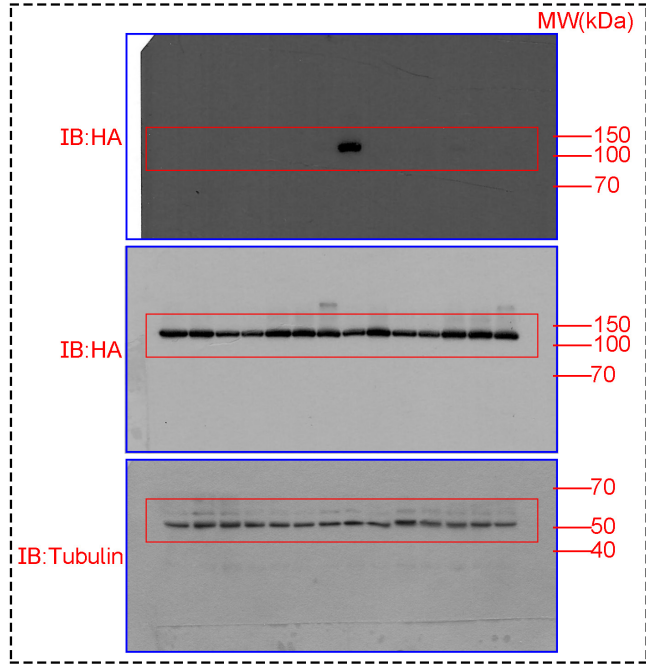

repeat1

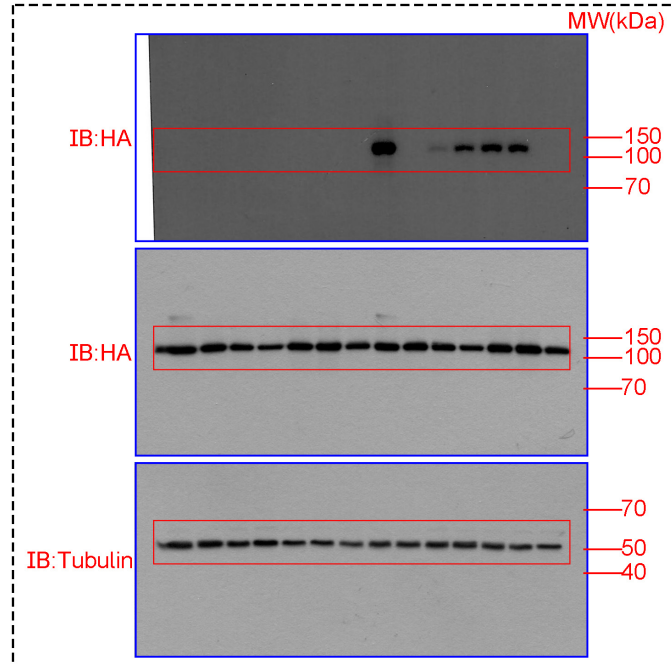

repeat1

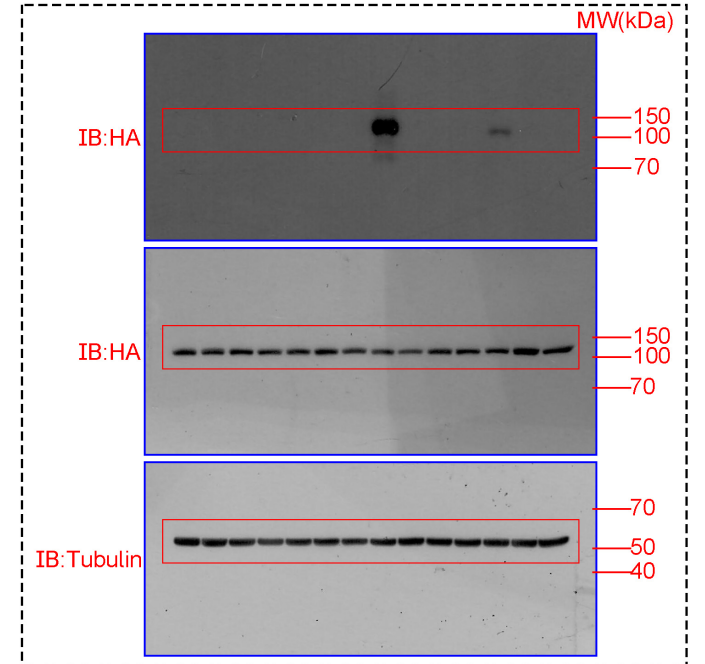

repeat2

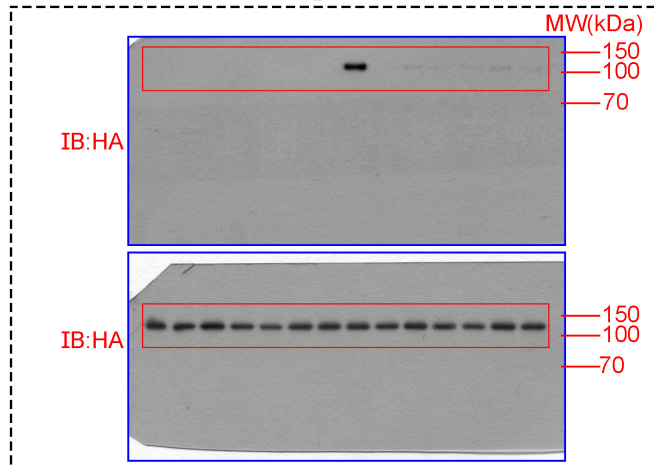

repeat2

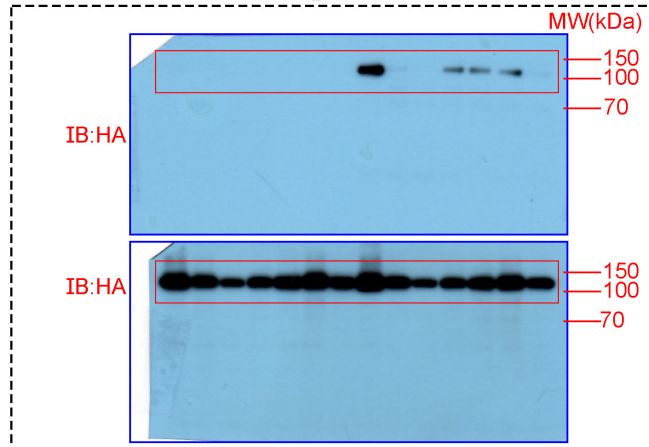

repeat2

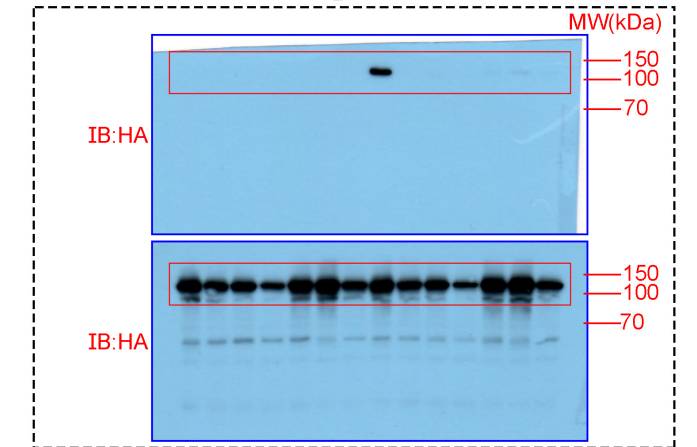

**repeat1****repeat2****repeat3****d**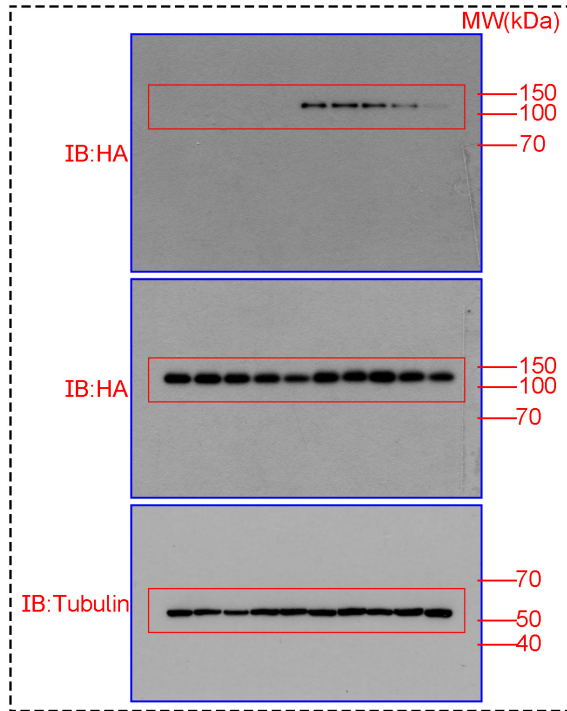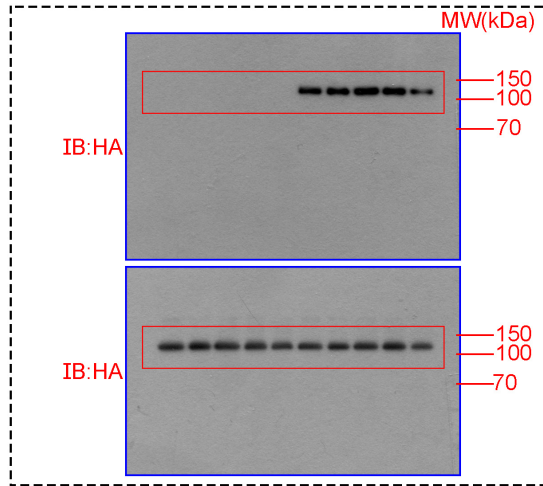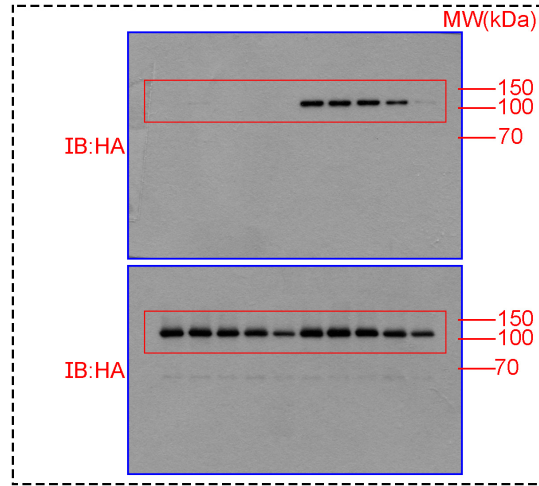**e**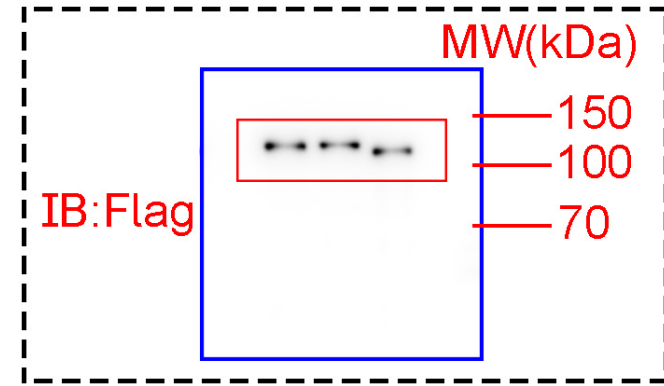**f**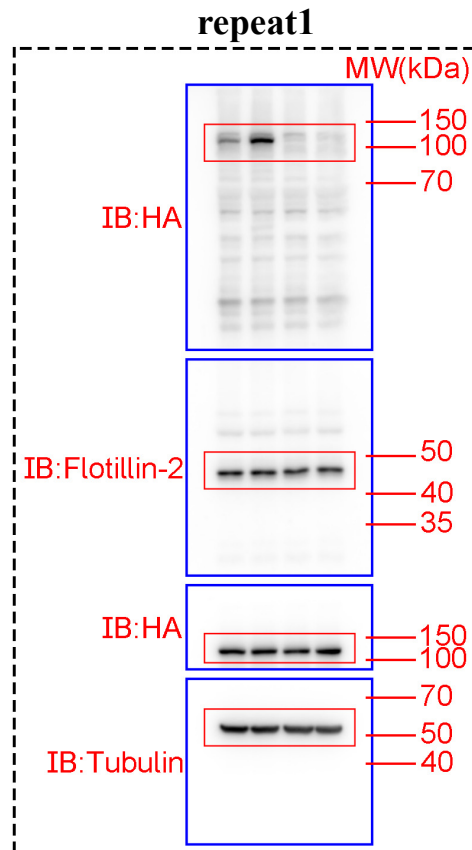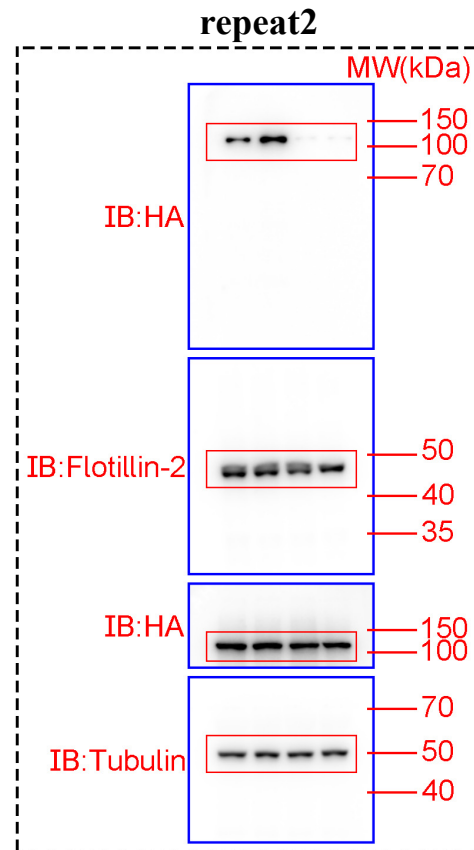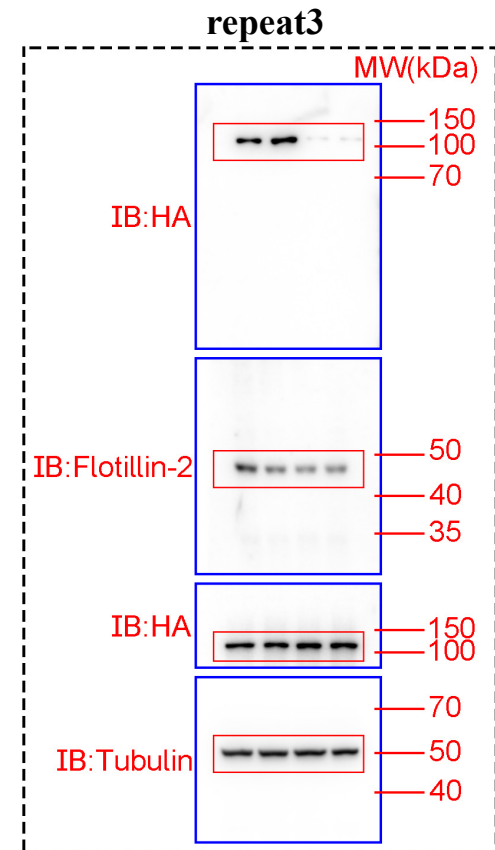

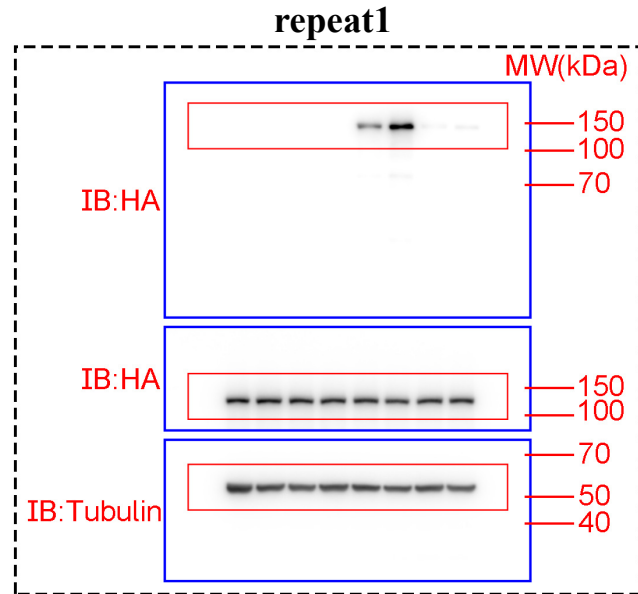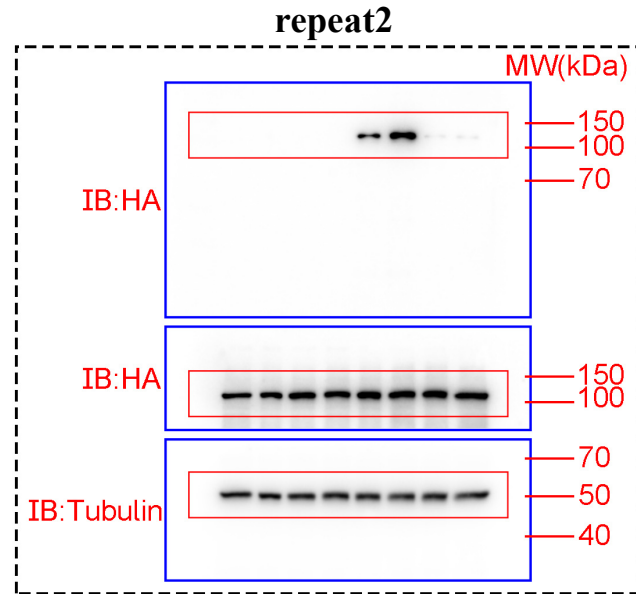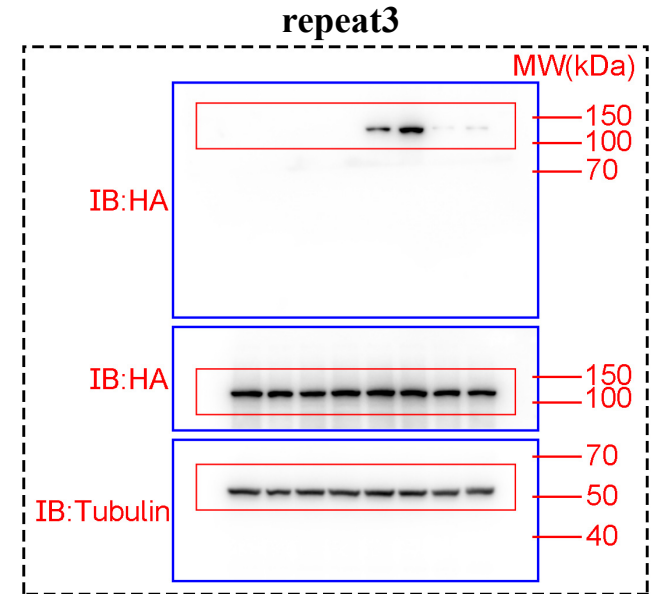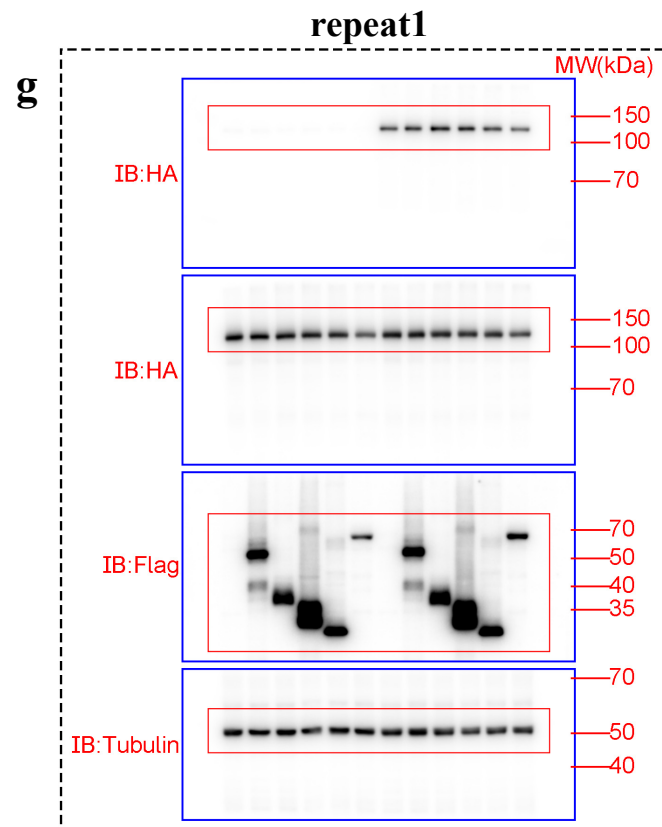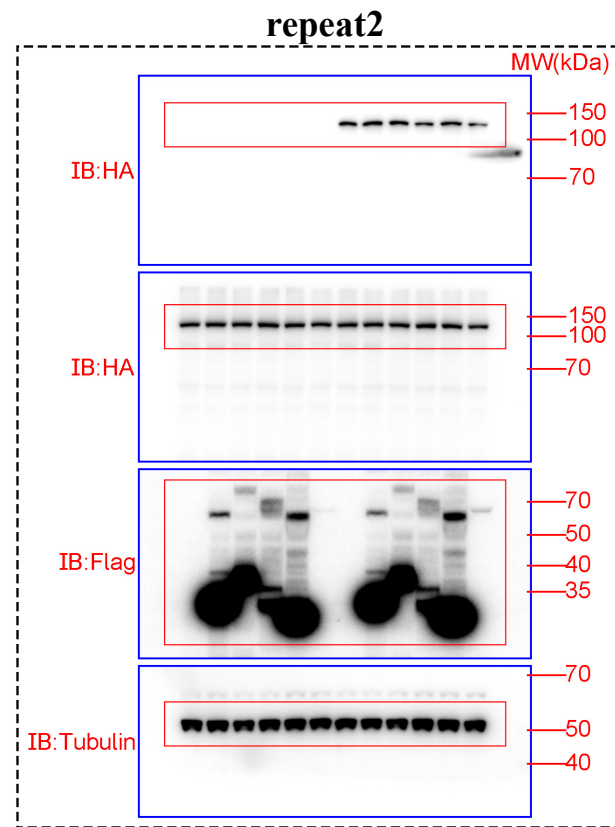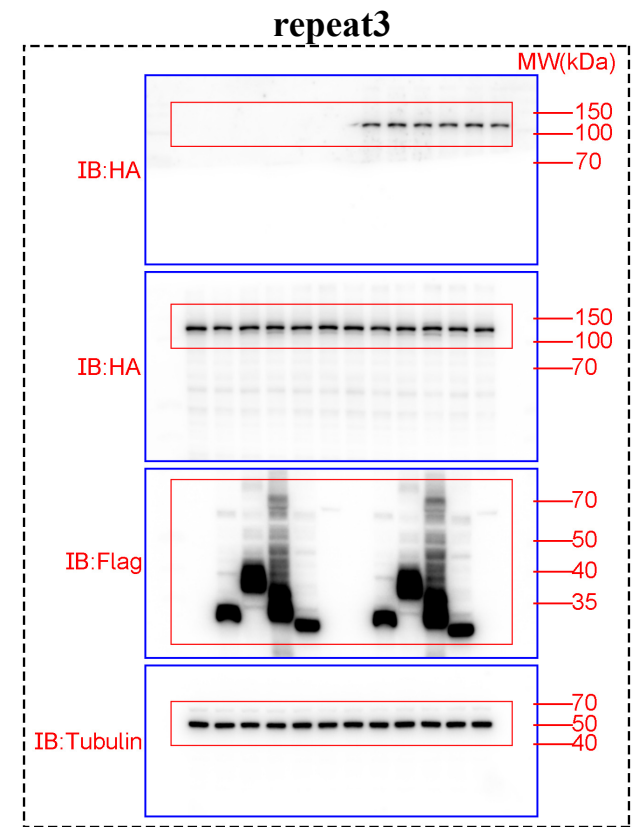



repeat1

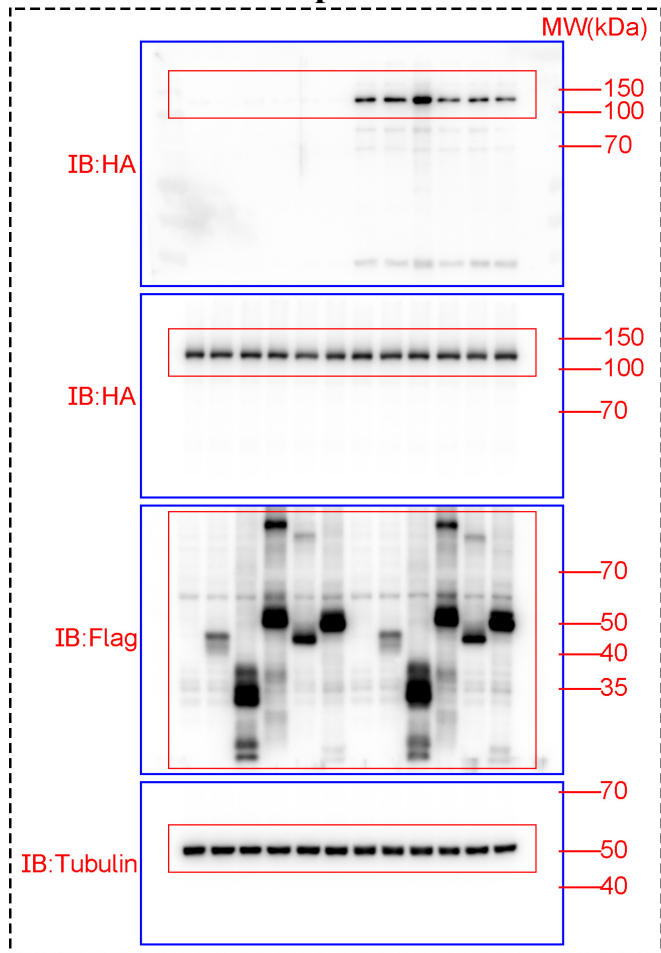

repeat2

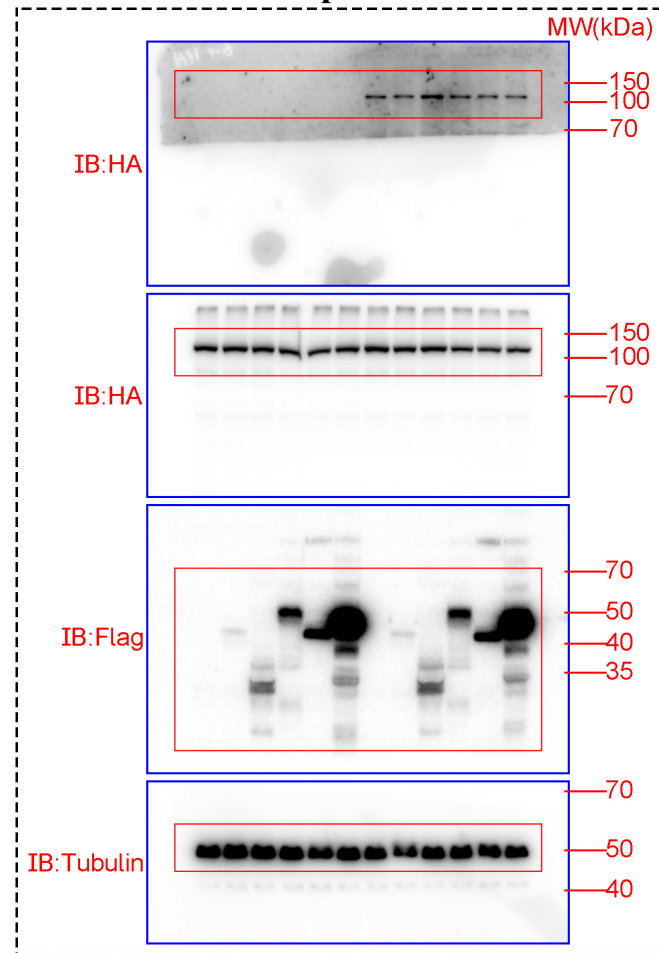

repeat3

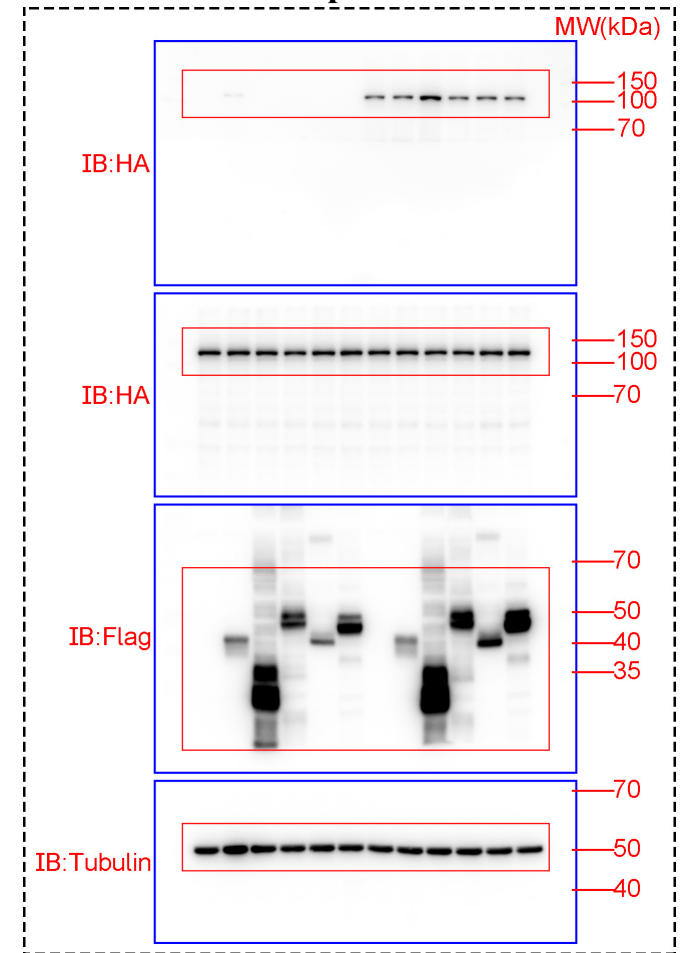

repeat1

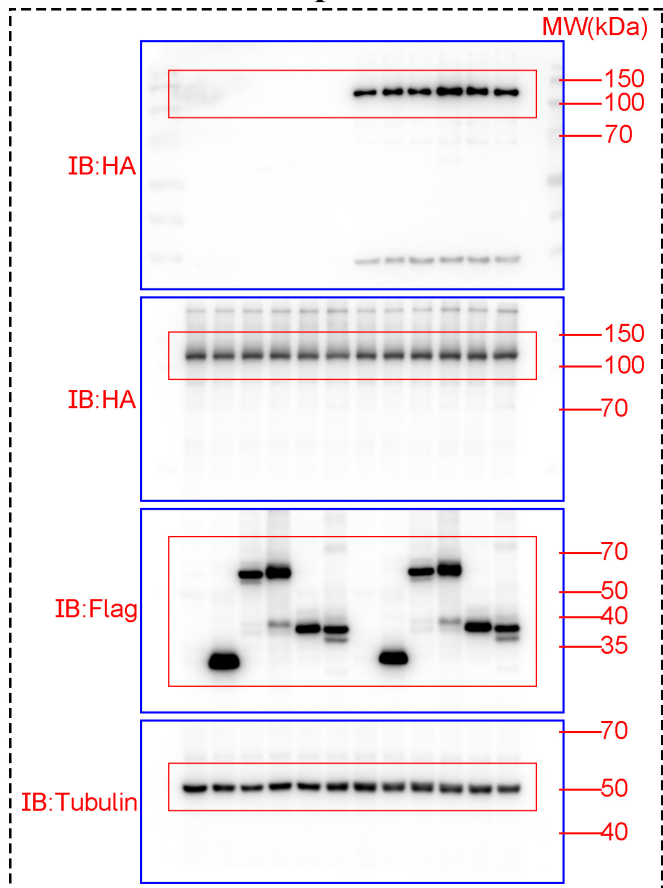

repeat2

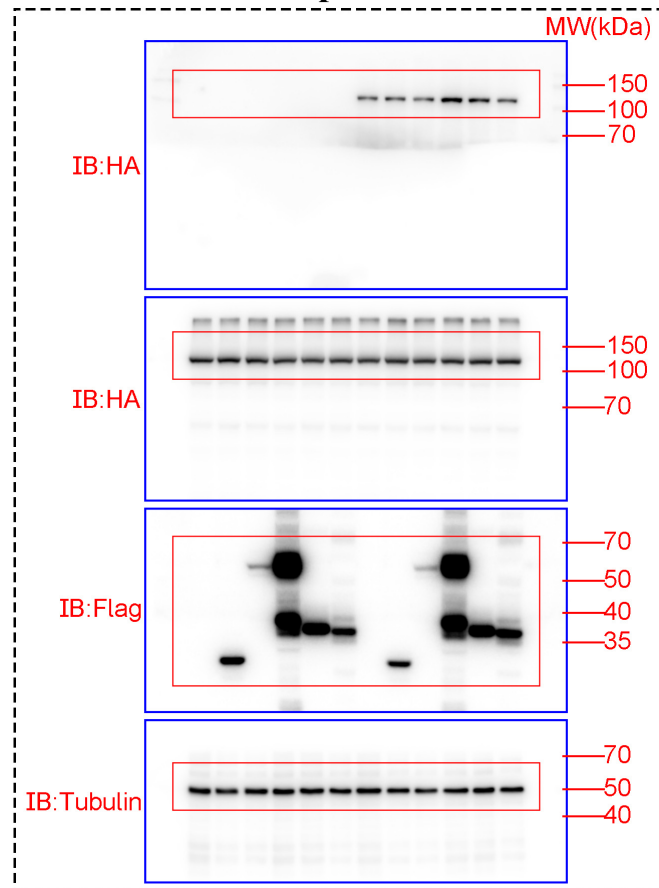

repeat3

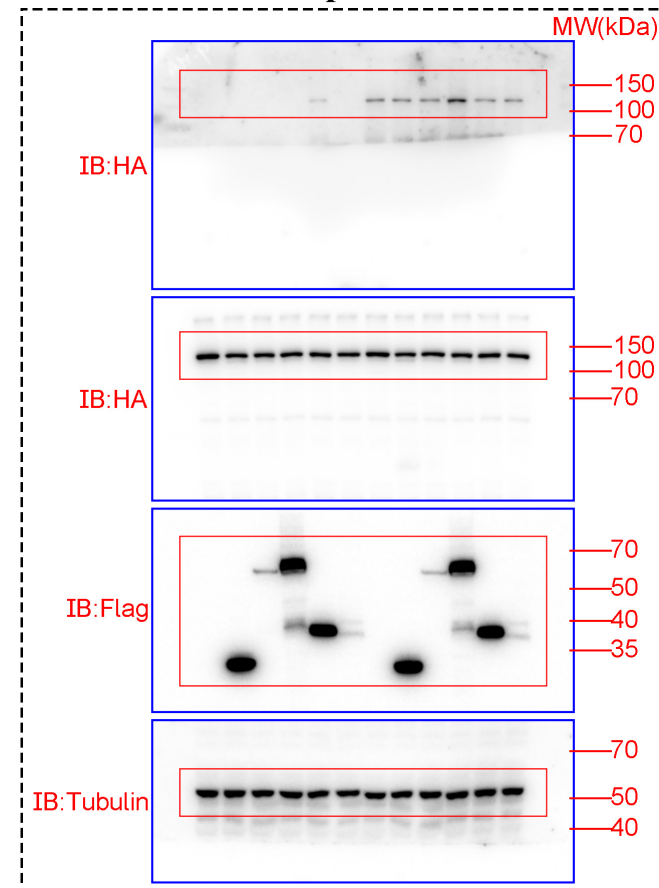

repeat1

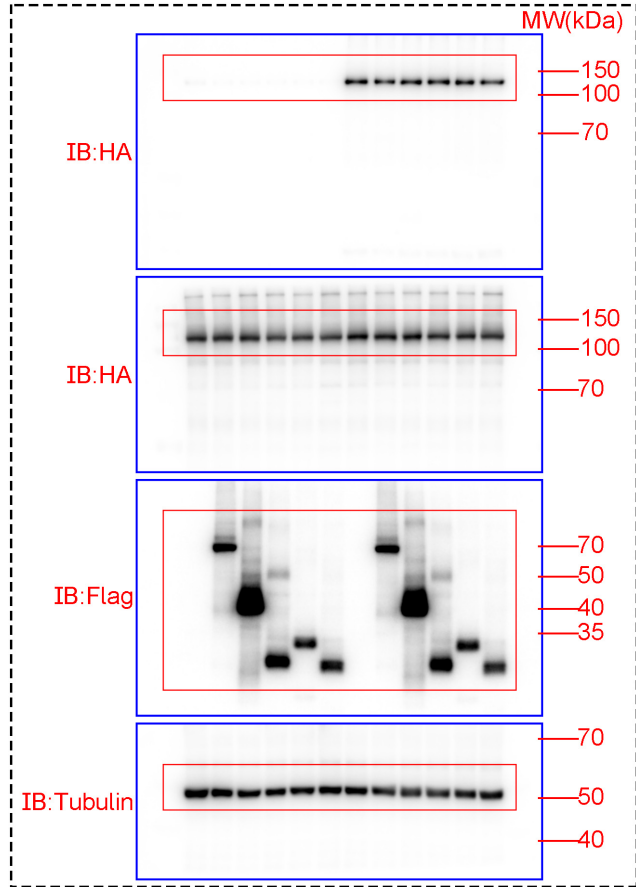

repeat2

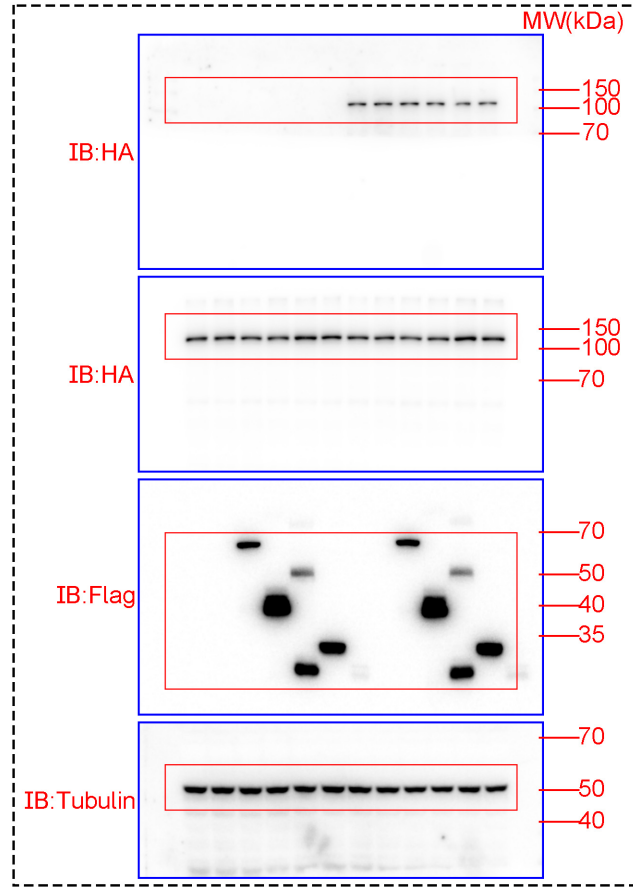

repeat3

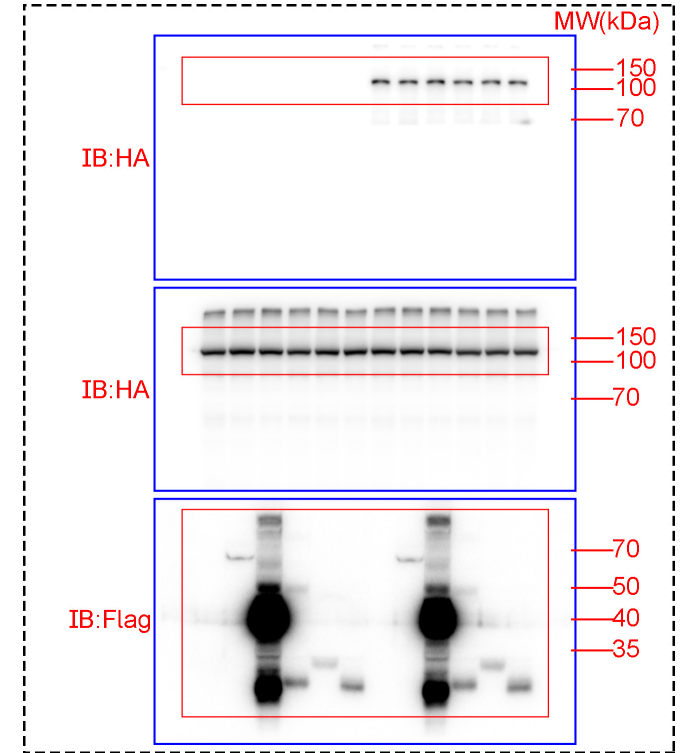

repeat1

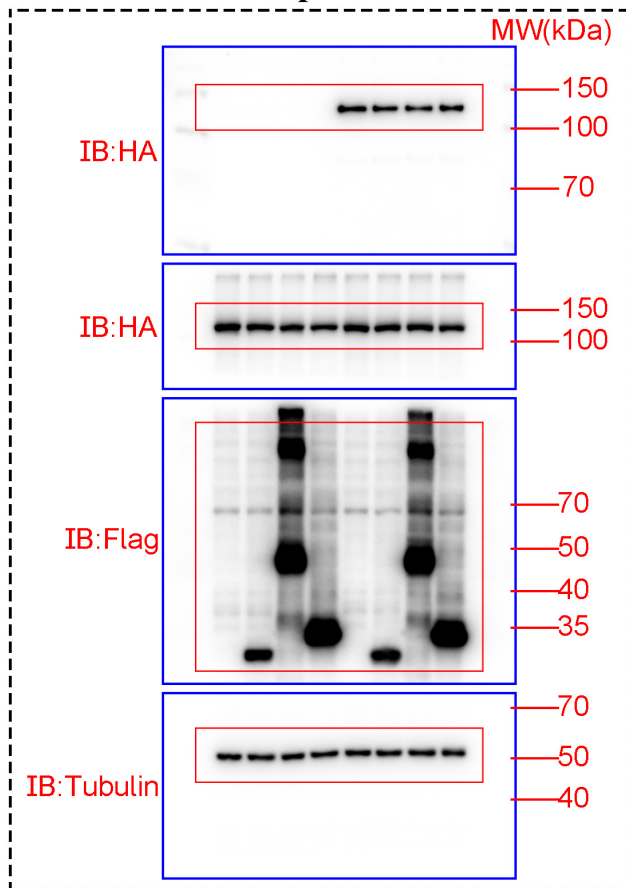

repeat2

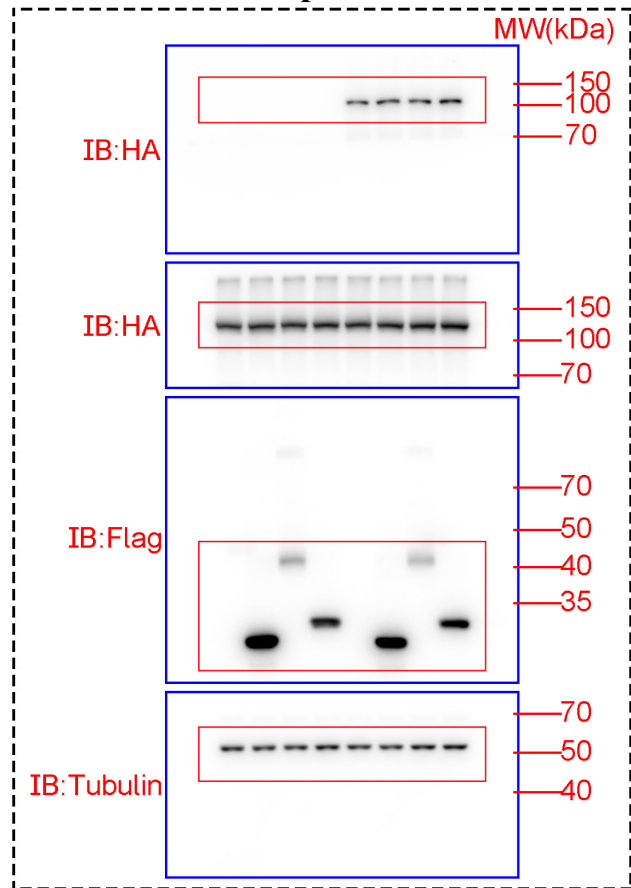

repeat3

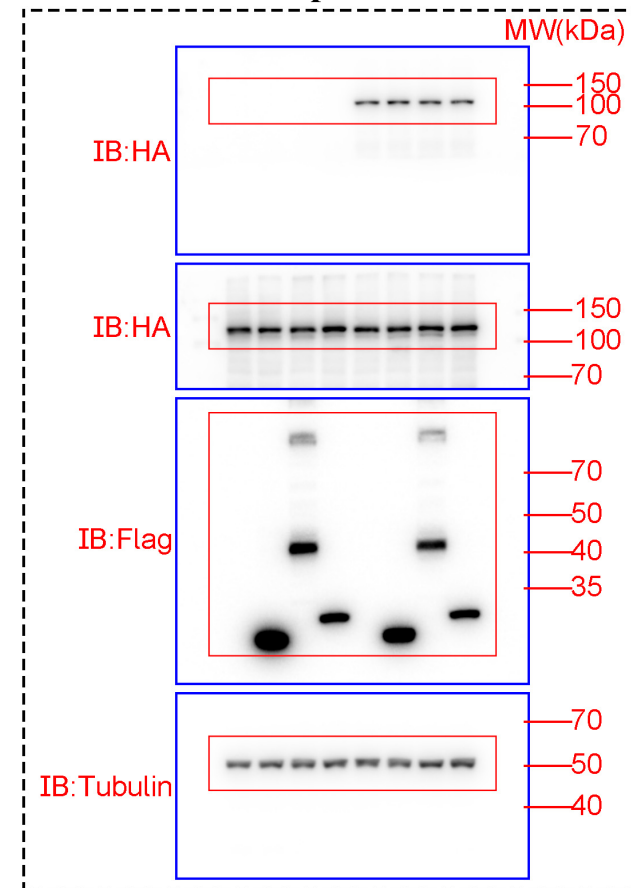



**h**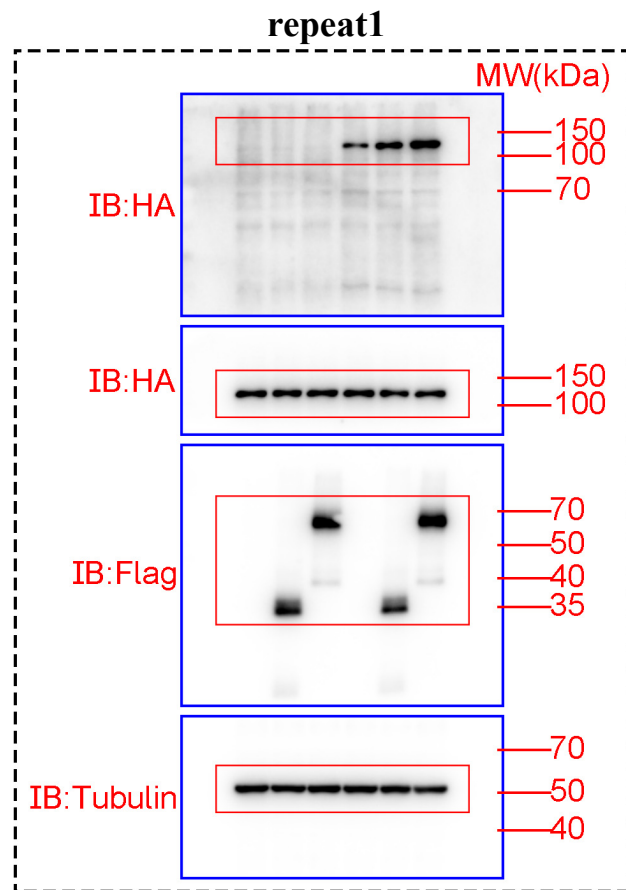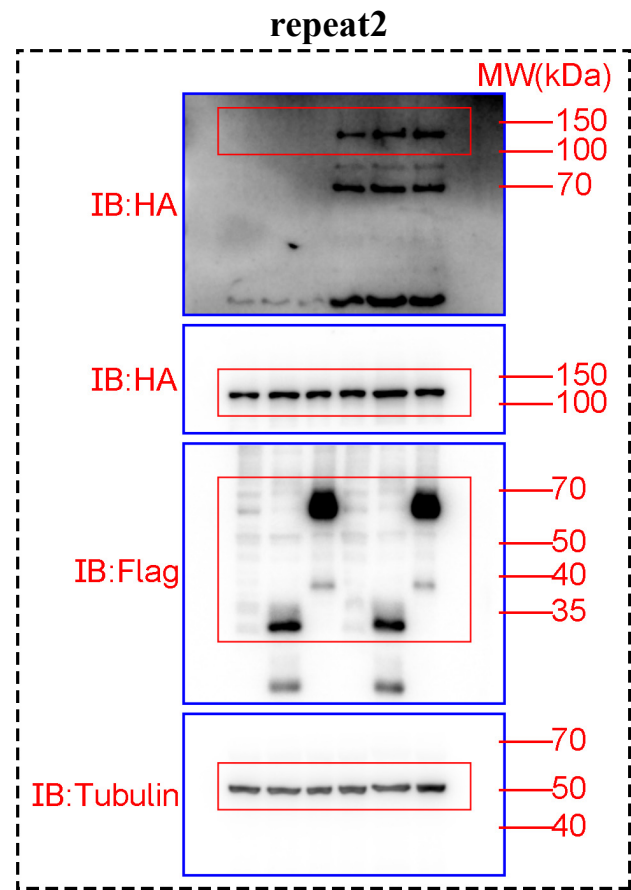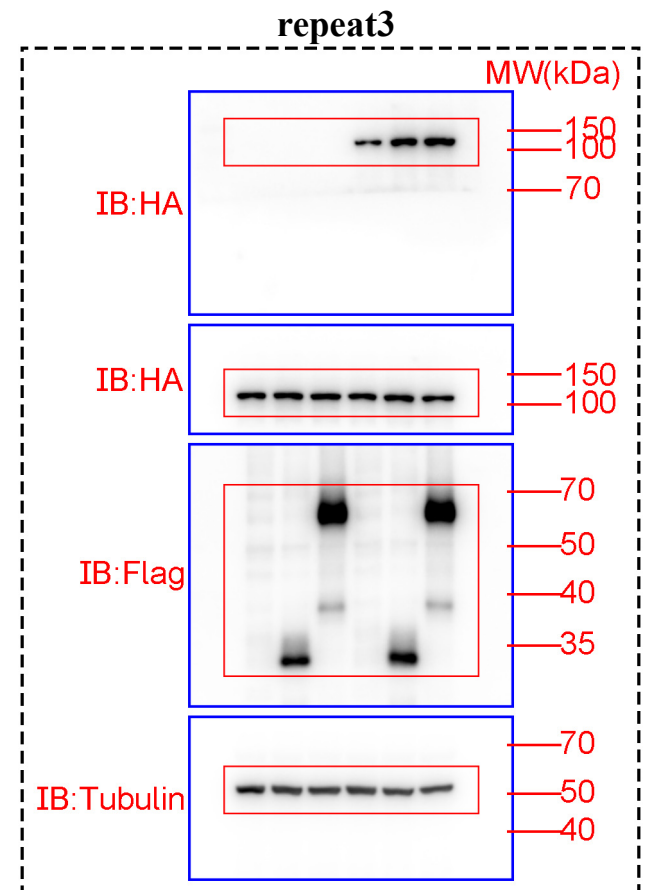

**j**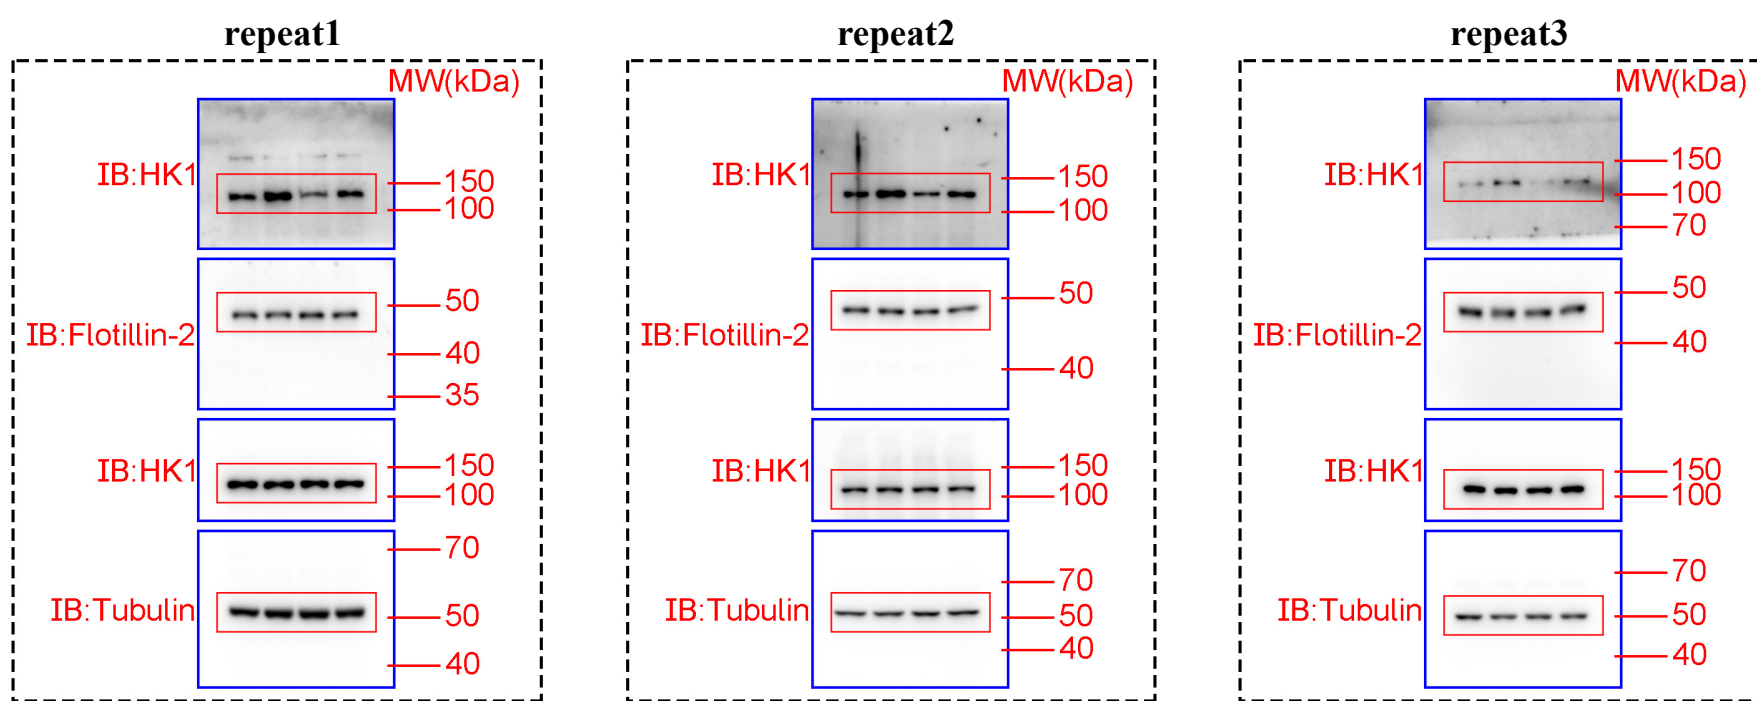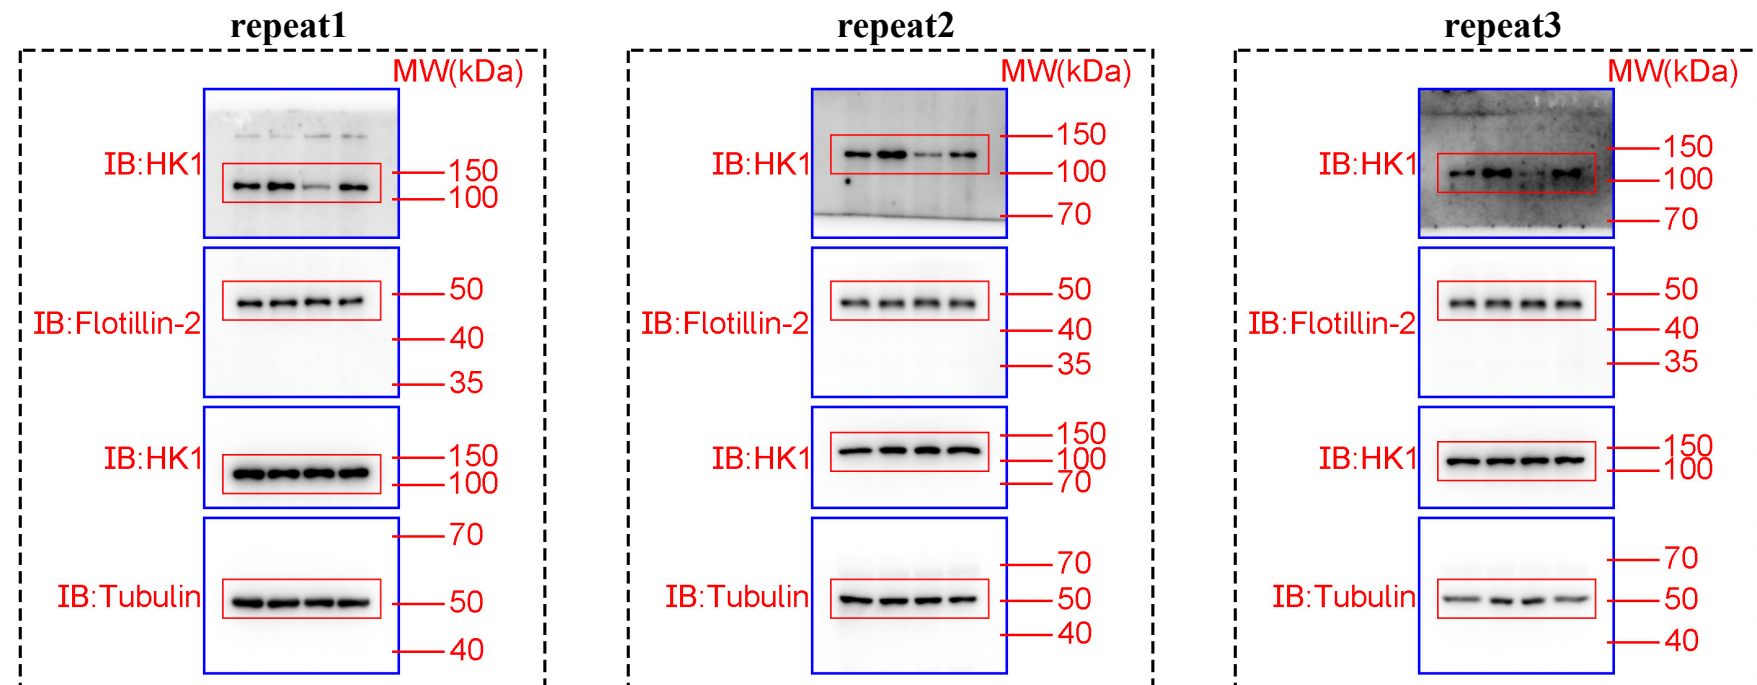

1

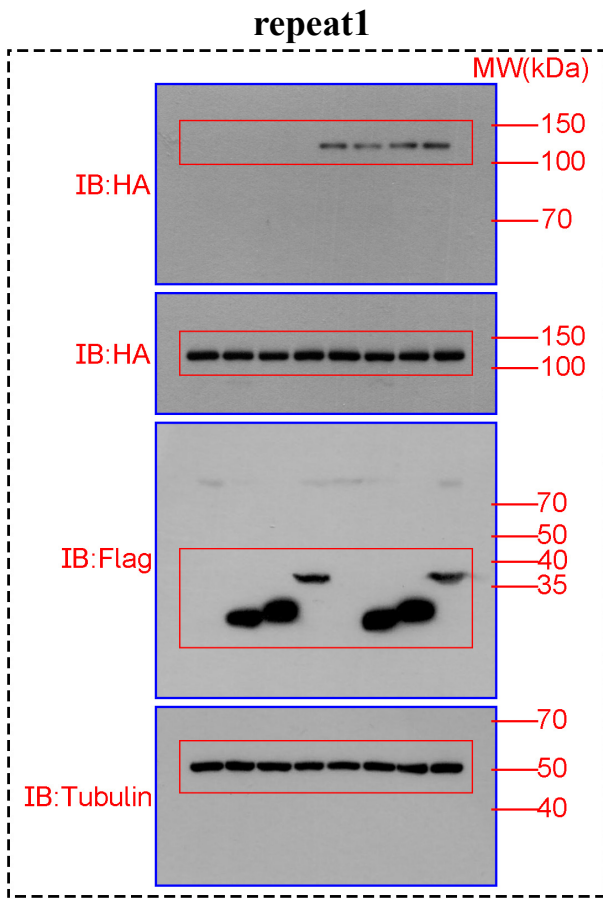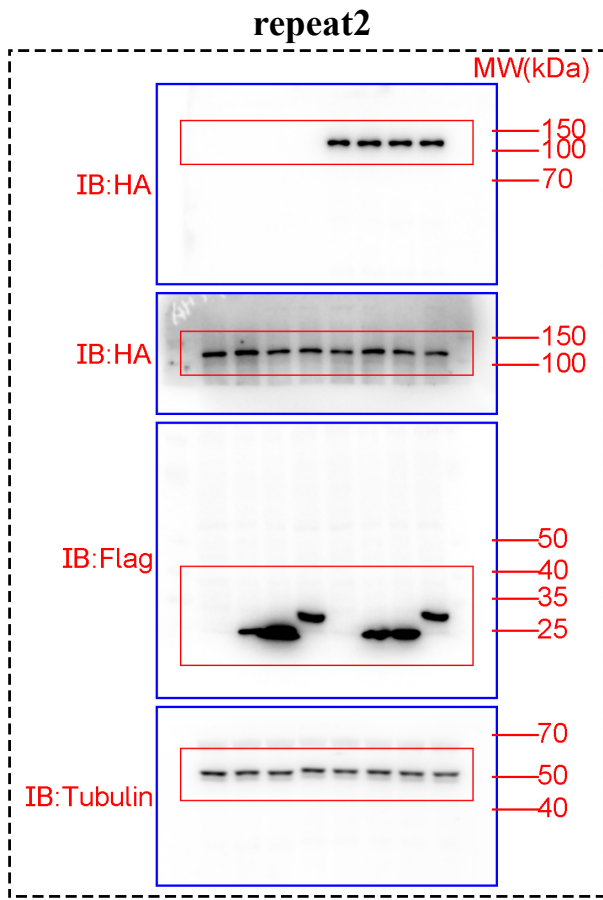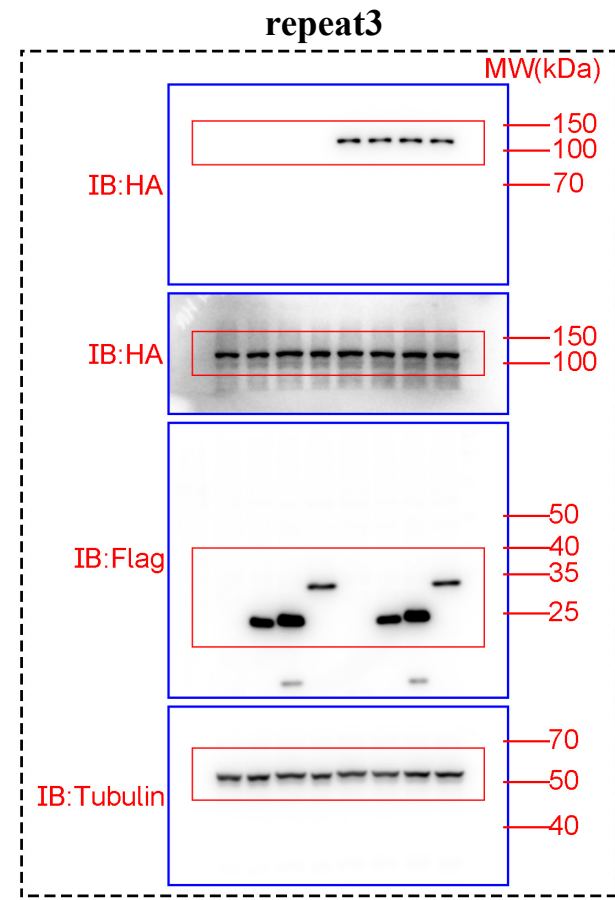

repeat1

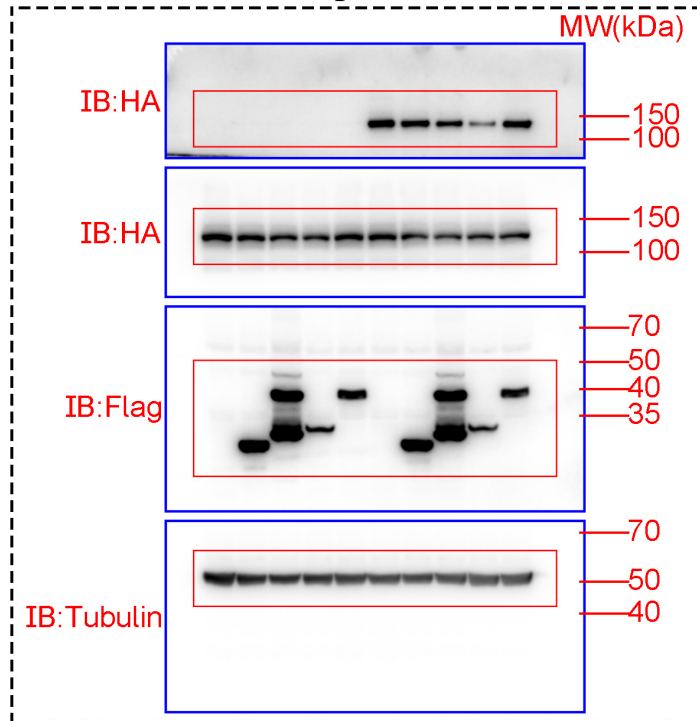

repeat2

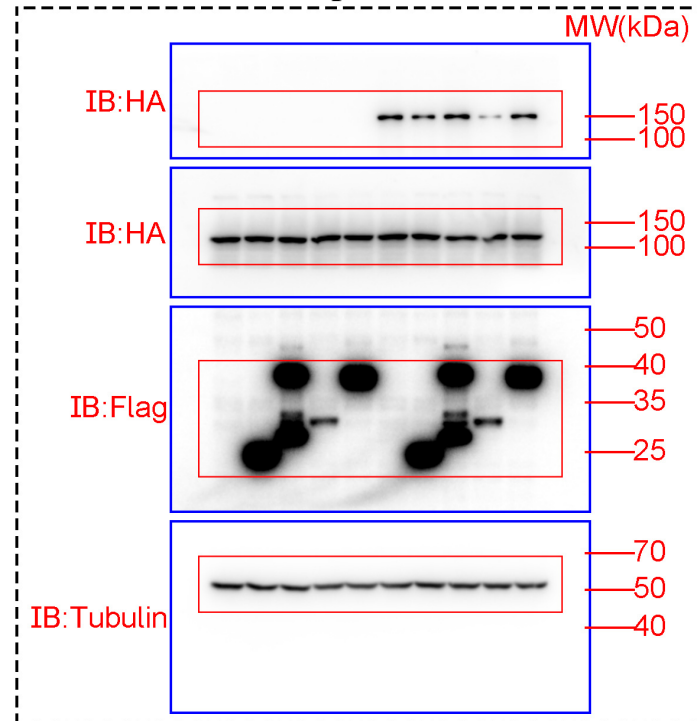

repeat3

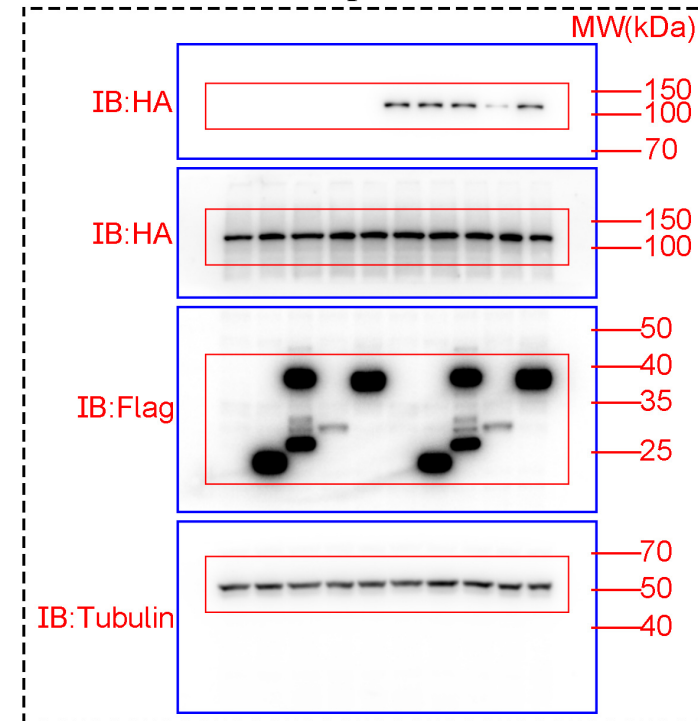

m

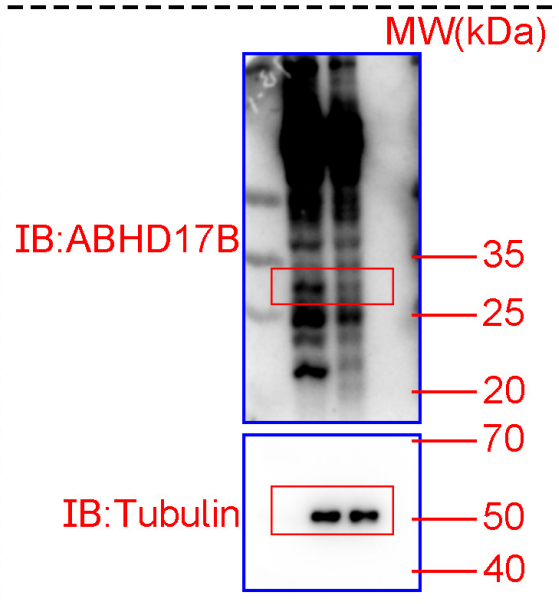



n

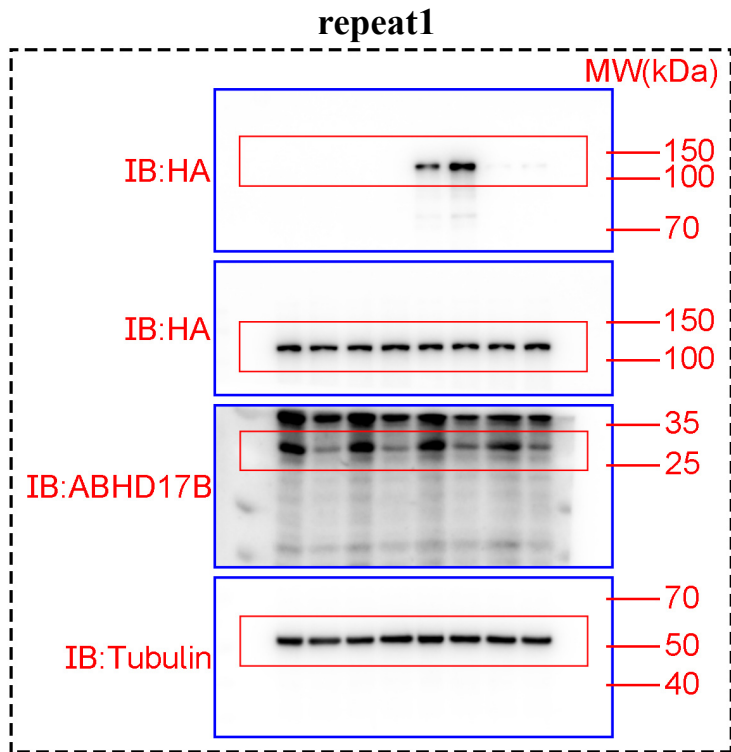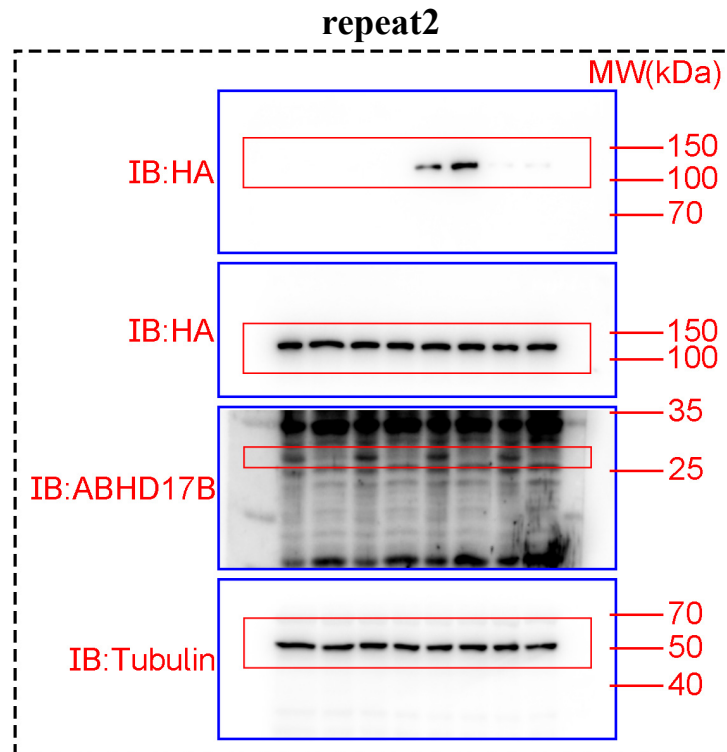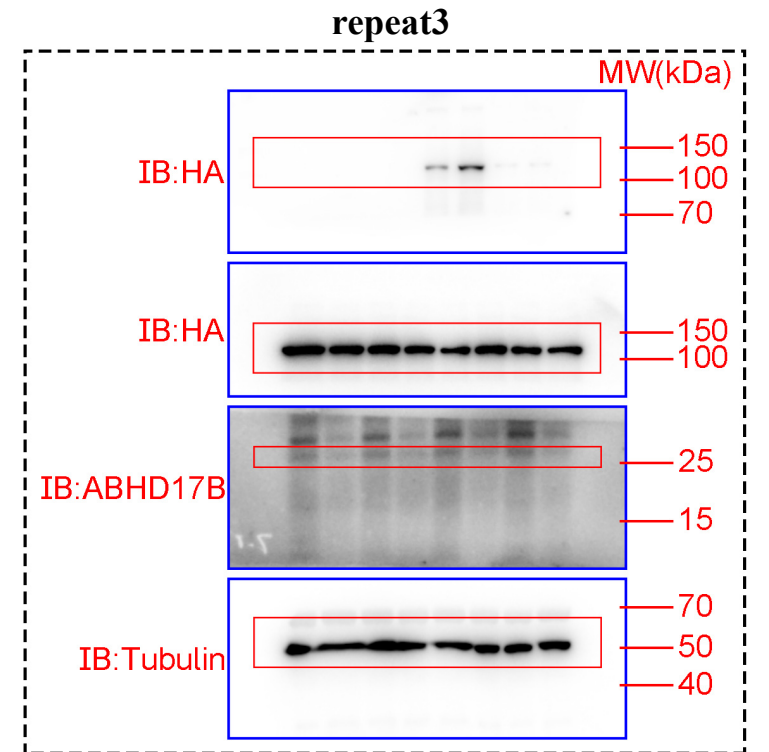

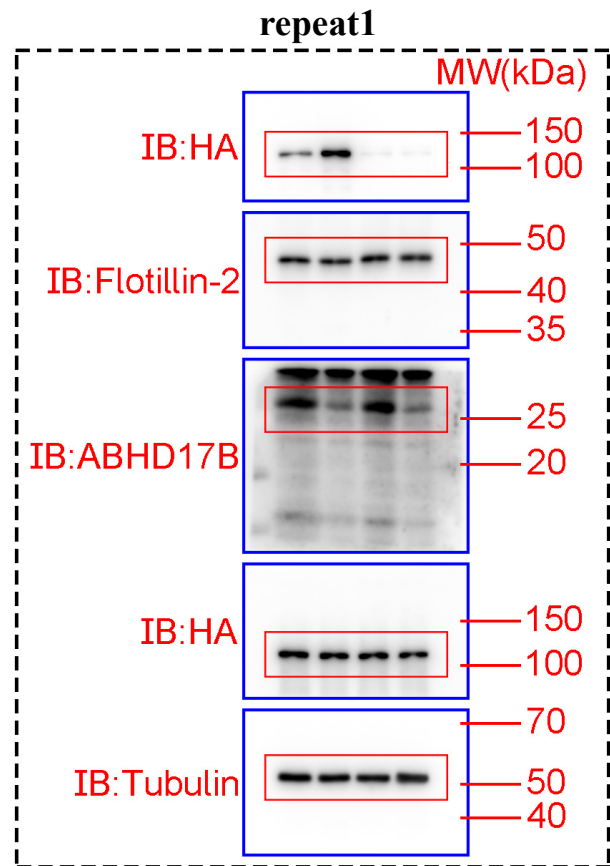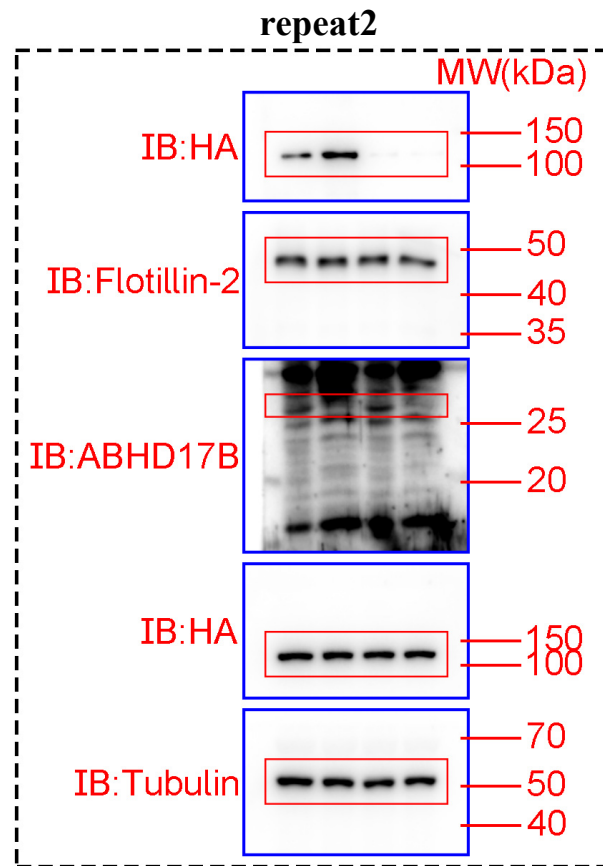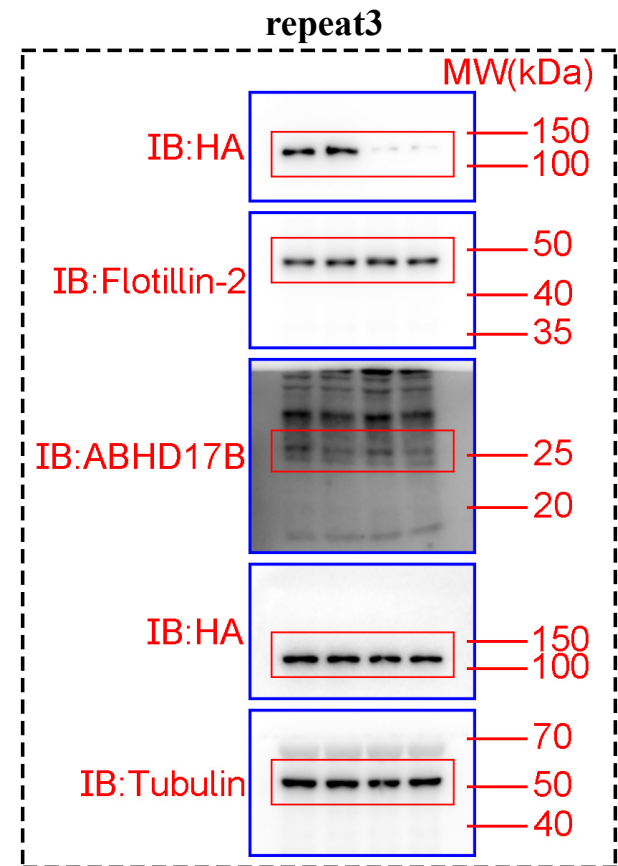

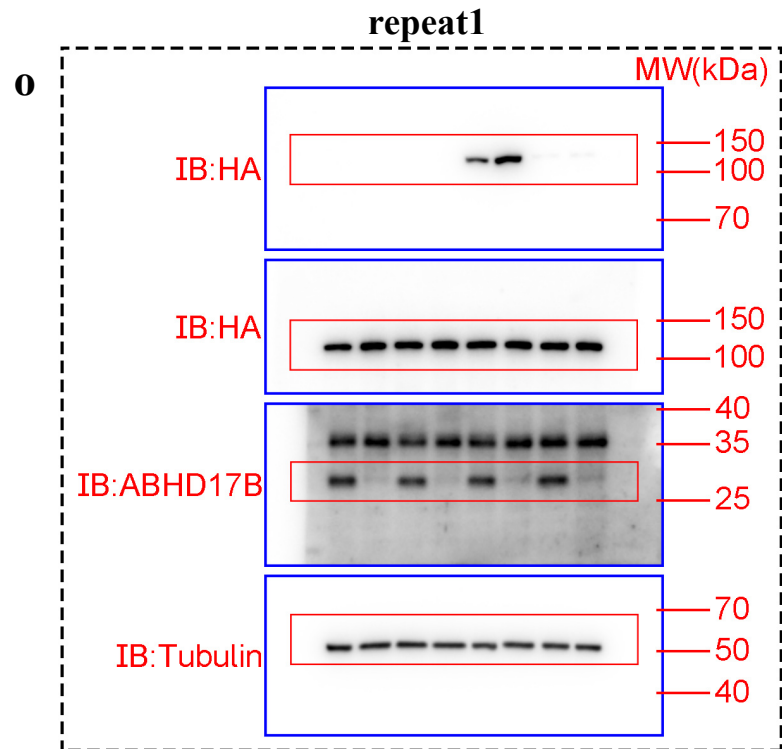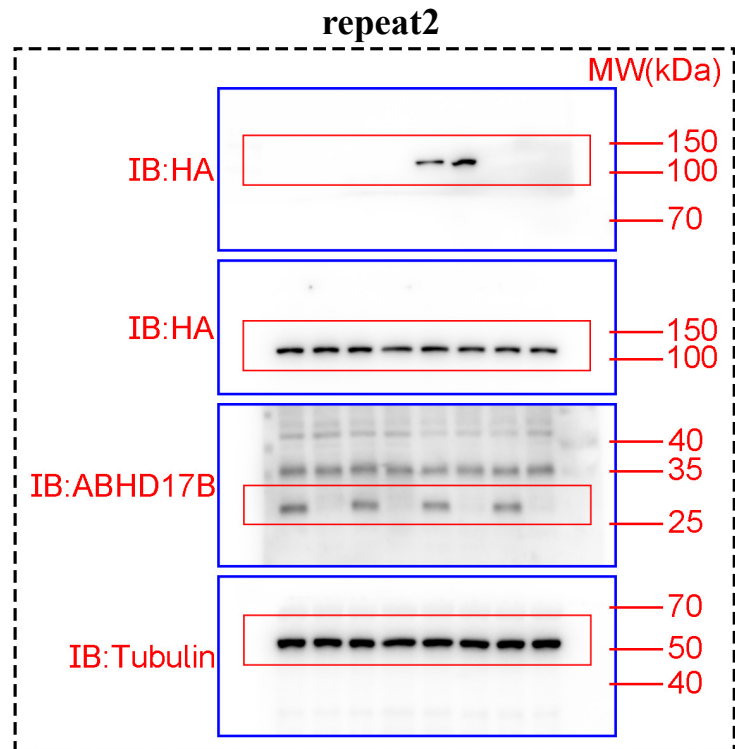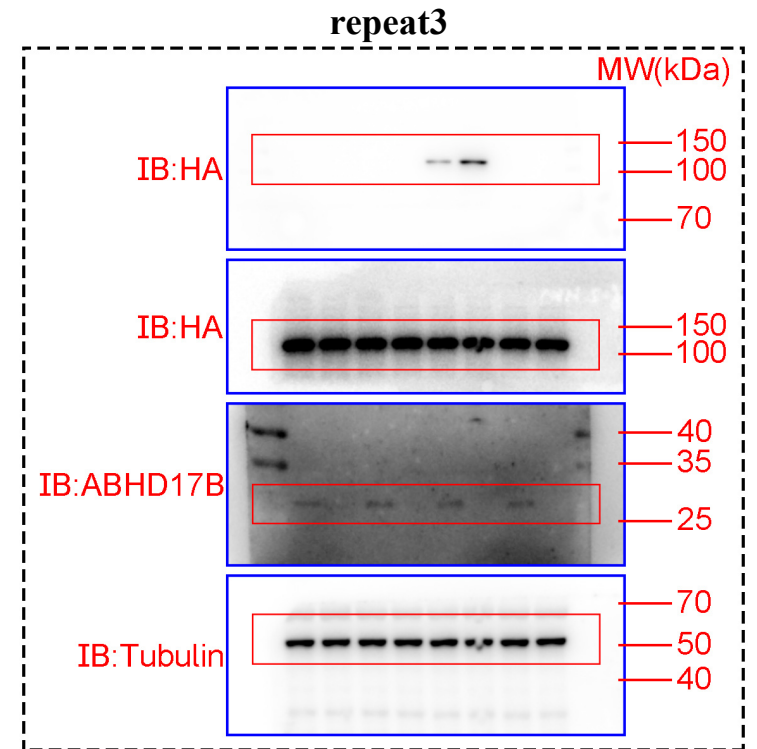

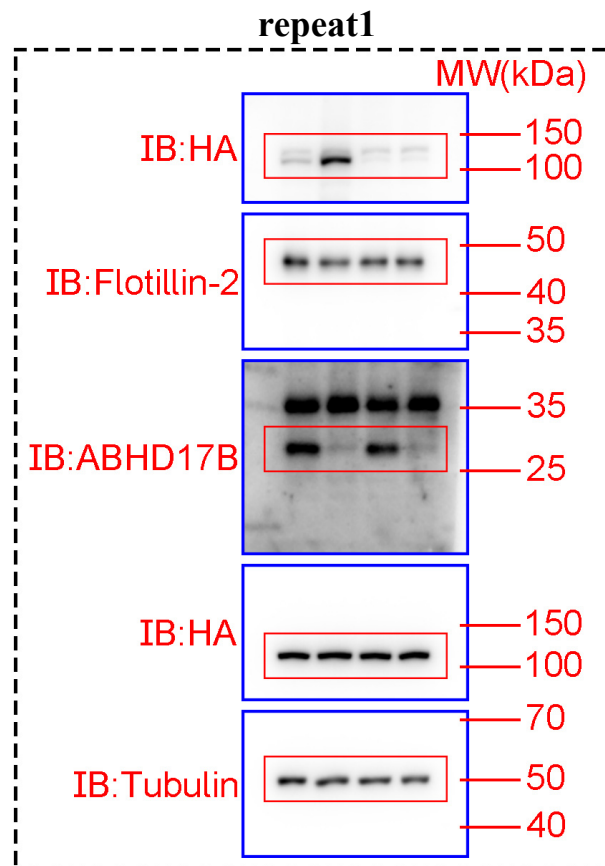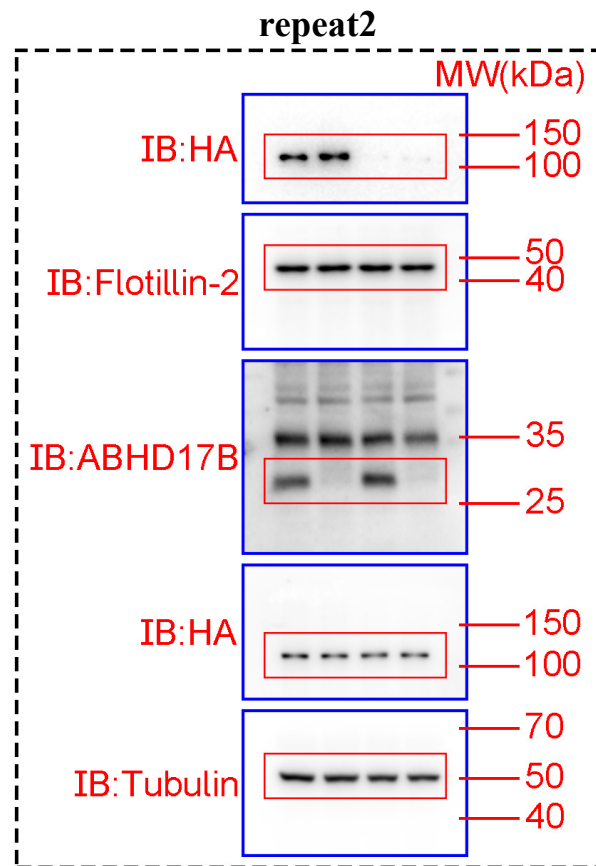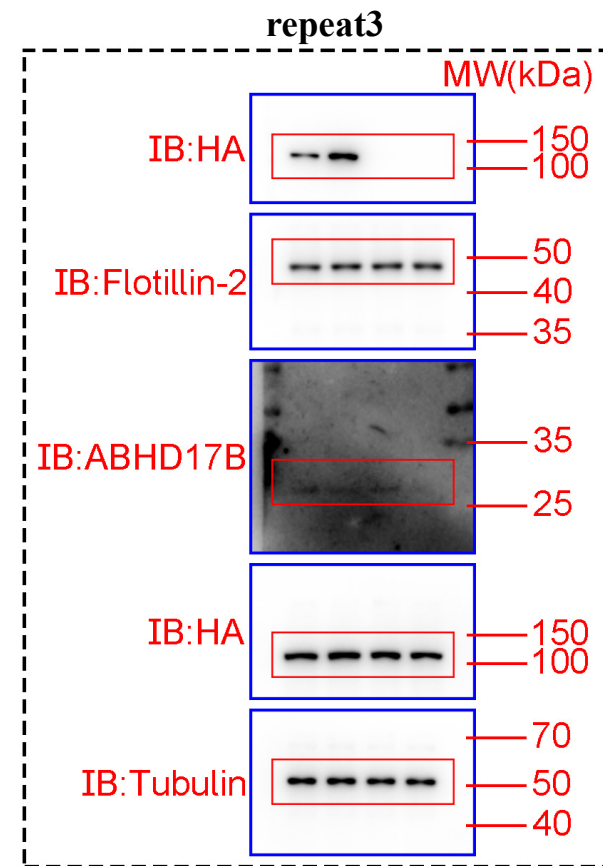

Supplement: 42255_2022_642_MOESM19_ESM.pdf [file 42255_2022_642_MOESM19_ESM.pdf]
